# Supplementary material for: Global Epidemiology and Burden of Elderly-Onset Inflammatory Bowel Disease: A Decade in Review
Source: MDPI journal article supplement (doi:10.3390/jcm12155142), 2023-08-06
Supplement: s1 [file s1]

**Supplementary Material Table S1.** Sociodemographic Index values for all estimated GBD 2019 locations, 2010-2019.

| Location                                         | 2010  | 2011  | 2012  | 2013  | 2014  | 2015  | 2016  | 2017  | 2018  | 2019  |
|--------------------------------------------------|-------|-------|-------|-------|-------|-------|-------|-------|-------|-------|
| Global                                           | 0.607 | 0.612 | 0.616 | 0.621 | 0.626 | 0.631 | 0.635 | 0.641 | 0.647 | 0.651 |
| Central Europe, eastern Europe, and central Asia | 0.732 | 0.735 | 0.738 | 0.742 | 0.745 | 0.748 | 0.751 | 0.754 | 0.758 | 0.76  |
| Central Asia                                     | 0.622 | 0.627 | 0.632 | 0.637 | 0.642 | 0.647 | 0.651 | 0.655 | 0.659 | 0.663 |
| Armenia                                          | 0.658 | 0.662 | 0.666 | 0.67  | 0.673 | 0.676 | 0.679 | 0.682 | 0.686 | 0.689 |
| Azerbaijan                                       | 0.637 | 0.645 | 0.652 | 0.658 | 0.664 | 0.669 | 0.673 | 0.677 | 0.68  | 0.683 |
| Georgia                                          | 0.665 | 0.668 | 0.672 | 0.676 | 0.68  | 0.684 | 0.688 | 0.693 | 0.697 | 0.702 |
| Kazakhstan                                       | 0.688 | 0.692 | 0.696 | 0.7   | 0.704 | 0.708 | 0.712 | 0.716 | 0.72  | 0.723 |
| Kyrgyzstan                                       | 0.56  | 0.563 | 0.565 | 0.569 | 0.574 | 0.578 | 0.583 | 0.588 | 0.592 | 0.596 |
| Mongolia                                         | 0.566 | 0.57  | 0.575 | 0.579 | 0.584 | 0.588 | 0.592 | 0.597 | 0.601 | 0.606 |
| Tajikistan                                       | 0.495 | 0.5   | 0.505 | 0.511 | 0.516 | 0.521 | 0.526 | 0.531 | 0.535 | 0.539 |
| Turkmenistan                                     | 0.616 | 0.622 | 0.628 | 0.635 | 0.642 | 0.648 | 0.654 | 0.66  | 0.666 | 0.67  |
| Uzbekistan                                       | 0.578 | 0.584 | 0.59  | 0.597 | 0.603 | 0.609 | 0.616 | 0.622 | 0.627 | 0.631 |
| Central Europe                                   | 0.756 | 0.76  | 0.764 | 0.768 | 0.771 | 0.775 | 0.778 | 0.781 | 0.785 | 0.788 |
| Albania                                          | 0.636 | 0.64  | 0.645 | 0.651 | 0.658 | 0.664 | 0.669 | 0.674 | 0.678 | 0.681 |
| Bosnia and Herzegovina                           | 0.682 | 0.686 | 0.691 | 0.695 | 0.698 | 0.702 | 0.706 | 0.71  | 0.714 | 0.718 |
| Bulgaria                                         | 0.733 | 0.737 | 0.74  | 0.743 | 0.746 | 0.75  | 0.752 | 0.755 | 0.76  | 0.764 |
| Croatia                                          | 0.763 | 0.767 | 0.77  | 0.774 | 0.777 | 0.781 | 0.784 | 0.788 | 0.791 | 0.794 |
| Czech Republic                                   | 0.813 | 0.816 | 0.818 | 0.819 | 0.82  | 0.82  | 0.82  | 0.822 | 0.825 | 0.828 |
| Hungary                                          | 0.772 | 0.773 | 0.774 | 0.774 | 0.775 | 0.778 | 0.781 | 0.784 | 0.788 | 0.791 |
| Montenegro                                       | 0.754 | 0.759 | 0.764 | 0.768 | 0.773 | 0.777 | 0.78  | 0.784 | 0.788 | 0.791 |
| North Macedonia                                  | 0.709 | 0.713 | 0.717 | 0.722 | 0.726 | 0.73  | 0.734 | 0.738 | 0.741 | 0.744 |
| Poland                                           | 0.763 | 0.77  | 0.775 | 0.78  | 0.784 | 0.788 | 0.791 | 0.795 | 0.798 | 0.802 |
| Romania                                          | 0.726 | 0.729 | 0.734 | 0.74  | 0.741 | 0.744 | 0.747 | 0.752 | 0.756 | 0.76  |
| Serbia                                           | 0.729 | 0.735 | 0.739 | 0.744 | 0.748 | 0.753 | 0.756 | 0.76  | 0.763 | 0.767 |
| Slovakia                                         | 0.789 | 0.794 | 0.798 | 0.801 | 0.803 | 0.803 | 0.804 | 0.805 | 0.808 | 0.812 |
| Slovenia                                         | 0.822 | 0.824 | 0.825 | 0.827 | 0.829 | 0.831 | 0.833 | 0.835 | 0.838 | 0.84  |
| Eastern Europe                                   | 0.762 | 0.765 | 0.768 | 0.772 | 0.777 | 0.781 | 0.785 | 0.788 | 0.791 | 0.793 |
| Belarus                                          | 0.703 | 0.709 | 0.713 | 0.719 | 0.725 | 0.73  | 0.734 | 0.738 | 0.742 | 0.745 |
| Estonia                                          | 0.798 | 0.804 | 0.809 | 0.813 | 0.817 | 0.821 | 0.825 | 0.829 | 0.833 | 0.835 |
| Latvia                                           | 0.797 | 0.798 | 0.801 | 0.803 | 0.804 | 0.805 | 0.809 | 0.813 | 0.817 | 0.82  |
| Lithuania                                        | 0.797 | 0.801 | 0.808 | 0.813 | 0.817 | 0.822 | 0.829 | 0.835 | 0.839 | 0.843 |
| Moldova                                          | 0.644 | 0.651 | 0.658 | 0.665 | 0.672 | 0.677 | 0.683 | 0.688 | 0.693 | 0.696 |
| Russia                                           | 0.775 | 0.777 | 0.779 | 0.784 | 0.788 | 0.793 | 0.797 | 0.801 | 0.803 | 0.805 |
| Ukraine                                          | 0.713 | 0.718 | 0.721 | 0.725 | 0.727 | 0.729 | 0.73  | 0.732 | 0.734 | 0.736 |
| High income                                      | 0.82  | 0.823 | 0.826 | 0.829 | 0.832 | 0.835 | 0.839 | 0.842 | 0.845 | 0.847 |
| Australasia                                      | 0.81  | 0.812 | 0.816 | 0.821 | 0.825 | 0.828 | 0.832 | 0.835 | 0.837 | 0.84  |
| Australia                                        | 0.809 | 0.812 | 0.815 | 0.82  | 0.824 | 0.828 | 0.832 | 0.834 | 0.837 | 0.839 |
| New Zealand                                      | 0.809 | 0.812 | 0.816 | 0.821 | 0.825 | 0.828 | 0.832 | 0.835 | 0.838 | 0.84  |
| High-income Asia Pacific                         | 0.847 | 0.85  | 0.853 | 0.856 | 0.859 | 0.862 | 0.865 | 0.868 | 0.871 | 0.873 |
| Brunei                                           | 0.789 | 0.793 | 0.797 | 0.801 | 0.806 | 0.809 | 0.813 | 0.817 | 0.82  | 0.823 |
| Japan                                            | 0.848 | 0.85  | 0.853 | 0.855 | 0.857 | 0.86  | 0.862 | 0.865 | 0.867 | 0.87  |
| Aichi                                            | 0.859 | 0.861 | 0.864 | 0.866 | 0.869 | 0.871 | 0.874 | 0.876 | 0.879 | 0.881 |

|             |       |       |       |       |       |       |       |       |       |       |
|-------------|-------|-------|-------|-------|-------|-------|-------|-------|-------|-------|
| Akita       | 0.806 | 0.808 | 0.811 | 0.813 | 0.816 | 0.819 | 0.822 | 0.824 | 0.827 | 0.83  |
| Aomori      | 0.8   | 0.803 | 0.806 | 0.809 | 0.811 | 0.814 | 0.817 | 0.82  | 0.823 | 0.826 |
| Chiba       | 0.842 | 0.844 | 0.846 | 0.848 | 0.85  | 0.852 | 0.855 | 0.857 | 0.859 | 0.861 |
| Ehime       | 0.818 | 0.82  | 0.822 | 0.824 | 0.827 | 0.83  | 0.833 | 0.836 | 0.838 | 0.841 |
| Fukui       | 0.833 | 0.836 | 0.838 | 0.84  | 0.842 | 0.844 | 0.846 | 0.849 | 0.851 | 0.854 |
| Fukuoka     | 0.837 | 0.84  | 0.842 | 0.844 | 0.846 | 0.848 | 0.85  | 0.853 | 0.855 | 0.858 |
| Fukushima   | 0.812 | 0.814 | 0.816 | 0.818 | 0.821 | 0.823 | 0.826 | 0.83  | 0.833 | 0.836 |
| Gifu        | 0.831 | 0.833 | 0.836 | 0.838 | 0.84  | 0.842 | 0.845 | 0.847 | 0.849 | 0.852 |
| Gunma       | 0.833 | 0.836 | 0.838 | 0.841 | 0.844 | 0.847 | 0.85  | 0.852 | 0.855 | 0.858 |
| Hiroshima   | 0.843 | 0.846 | 0.849 | 0.851 | 0.854 | 0.857 | 0.859 | 0.862 | 0.865 | 0.868 |
| Hokkaidō    | 0.823 | 0.825 | 0.827 | 0.829 | 0.831 | 0.833 | 0.836 | 0.838 | 0.841 | 0.843 |
| Hyōgo       | 0.845 | 0.848 | 0.85  | 0.852 | 0.854 | 0.857 | 0.859 | 0.862 | 0.864 | 0.866 |
| Ibaraki     | 0.834 | 0.837 | 0.839 | 0.842 | 0.844 | 0.847 | 0.85  | 0.852 | 0.855 | 0.858 |
| Ishikawa    | 0.835 | 0.837 | 0.839 | 0.841 | 0.843 | 0.846 | 0.848 | 0.851 | 0.854 | 0.856 |
| Iwate       | 0.803 | 0.806 | 0.808 | 0.811 | 0.814 | 0.818 | 0.821 | 0.824 | 0.828 | 0.831 |
| Kagawa      | 0.831 | 0.834 | 0.837 | 0.839 | 0.842 | 0.844 | 0.847 | 0.85  | 0.853 | 0.855 |
| Kagoshima   | 0.806 | 0.808 | 0.811 | 0.813 | 0.816 | 0.819 | 0.822 | 0.825 | 0.828 | 0.831 |
| Kanagawa    | 0.867 | 0.869 | 0.87  | 0.872 | 0.873 | 0.875 | 0.877 | 0.878 | 0.88  | 0.882 |
| Kōchi       | 0.807 | 0.81  | 0.812 | 0.815 | 0.817 | 0.82  | 0.823 | 0.826 | 0.829 | 0.832 |
| Kumamoto    | 0.808 | 0.811 | 0.813 | 0.816 | 0.819 | 0.822 | 0.825 | 0.828 | 0.831 | 0.834 |
| Kyōto       | 0.855 | 0.857 | 0.859 | 0.861 | 0.863 | 0.865 | 0.868 | 0.87  | 0.872 | 0.875 |
| Mie         | 0.832 | 0.835 | 0.838 | 0.841 | 0.844 | 0.847 | 0.85  | 0.853 | 0.856 | 0.859 |
| Miyagi      | 0.831 | 0.834 | 0.837 | 0.839 | 0.842 | 0.845 | 0.848 | 0.851 | 0.854 | 0.857 |
| Miyazaki    | 0.799 | 0.802 | 0.805 | 0.807 | 0.81  | 0.814 | 0.817 | 0.82  | 0.823 | 0.826 |
| Nagano      | 0.835 | 0.837 | 0.839 | 0.841 | 0.843 | 0.845 | 0.848 | 0.851 | 0.853 | 0.856 |
| Nagasaki    | 0.801 | 0.804 | 0.807 | 0.81  | 0.813 | 0.815 | 0.818 | 0.821 | 0.824 | 0.827 |
| Nara        | 0.834 | 0.836 | 0.837 | 0.839 | 0.841 | 0.843 | 0.845 | 0.847 | 0.849 | 0.851 |
| Niigata     | 0.821 | 0.823 | 0.826 | 0.829 | 0.832 | 0.834 | 0.837 | 0.84  | 0.842 | 0.845 |
| Ōita        | 0.825 | 0.827 | 0.83  | 0.832 | 0.834 | 0.836 | 0.839 | 0.841 | 0.844 | 0.847 |
| Okayama     | 0.838 | 0.841 | 0.843 | 0.845 | 0.848 | 0.85  | 0.853 | 0.855 | 0.858 | 0.861 |
| Okinawa     | 0.795 | 0.798 | 0.8   | 0.802 | 0.804 | 0.807 | 0.81  | 0.813 | 0.816 | 0.819 |
| Ōsaka       | 0.856 | 0.858 | 0.86  | 0.862 | 0.864 | 0.866 | 0.869 | 0.871 | 0.873 | 0.875 |
| Saga        | 0.812 | 0.814 | 0.816 | 0.818 | 0.82  | 0.822 | 0.825 | 0.828 | 0.831 | 0.834 |
| Saitama     | 0.837 | 0.839 | 0.841 | 0.843 | 0.845 | 0.847 | 0.849 | 0.851 | 0.854 | 0.856 |
| Shiga       | 0.853 | 0.855 | 0.858 | 0.86  | 0.862 | 0.864 | 0.867 | 0.869 | 0.872 | 0.874 |
| Shimane     | 0.809 | 0.812 | 0.815 | 0.818 | 0.821 | 0.824 | 0.827 | 0.83  | 0.833 | 0.836 |
| Shizuoka    | 0.84  | 0.843 | 0.845 | 0.848 | 0.851 | 0.853 | 0.856 | 0.858 | 0.861 | 0.864 |
| Tochigi     | 0.834 | 0.836 | 0.839 | 0.841 | 0.844 | 0.847 | 0.851 | 0.854 | 0.857 | 0.859 |
| Tokushima   | 0.828 | 0.831 | 0.833 | 0.836 | 0.839 | 0.842 | 0.845 | 0.848 | 0.851 | 0.854 |
| Tōkyō       | 0.913 | 0.915 | 0.917 | 0.918 | 0.92  | 0.921 | 0.923 | 0.924 | 0.925 | 0.927 |
| Tottori     | 0.815 | 0.816 | 0.818 | 0.82  | 0.822 | 0.825 | 0.827 | 0.83  | 0.833 | 0.835 |
| Toyama      | 0.842 | 0.844 | 0.846 | 0.848 | 0.85  | 0.853 | 0.855 | 0.858 | 0.861 | 0.863 |
| Wakayama    | 0.819 | 0.822 | 0.825 | 0.828 | 0.832 | 0.835 | 0.838 | 0.842 | 0.845 | 0.848 |
| Yamagata    | 0.81  | 0.813 | 0.816 | 0.818 | 0.821 | 0.824 | 0.827 | 0.83  | 0.833 | 0.835 |
| Yamaguchi   | 0.83  | 0.833 | 0.836 | 0.839 | 0.841 | 0.844 | 0.847 | 0.849 | 0.852 | 0.855 |
| Yamanashi   | 0.836 | 0.839 | 0.841 | 0.843 | 0.846 | 0.848 | 0.851 | 0.853 | 0.856 | 0.858 |
| South Korea | 0.842 | 0.846 | 0.851 | 0.855 | 0.859 | 0.863 | 0.867 | 0.871 | 0.875 | 0.878 |

|                           |       |       |       |       |       |       |       |       |       |       |
|---------------------------|-------|-------|-------|-------|-------|-------|-------|-------|-------|-------|
| Singapore                 | 0.835 | 0.839 | 0.843 | 0.847 | 0.85  | 0.852 | 0.855 | 0.858 | 0.86  | 0.861 |
| High-income North America | 0.834 | 0.837 | 0.841 | 0.844 | 0.847 | 0.85  | 0.854 | 0.857 | 0.859 | 0.86  |
| Canada                    | 0.851 | 0.853 | 0.856 | 0.859 | 0.861 | 0.864 | 0.867 | 0.869 | 0.871 | 0.873 |
| Greenland                 | 0.728 | 0.734 | 0.737 | 0.74  | 0.743 | 0.747 | 0.751 | 0.756 | 0.759 | 0.761 |
| USA                       | 0.832 | 0.835 | 0.839 | 0.842 | 0.845 | 0.849 | 0.853 | 0.856 | 0.858 | 0.859 |
| Alabama                   | 0.801 | 0.805 | 0.809 | 0.811 | 0.812 | 0.814 | 0.816 | 0.818 | 0.819 | 0.819 |
| Alaska                    | 0.817 | 0.821 | 0.826 | 0.83  | 0.834 | 0.839 | 0.844 | 0.848 | 0.85  | 0.851 |
| Arizona                   | 0.81  | 0.814 | 0.818 | 0.822 | 0.825 | 0.829 | 0.834 | 0.838 | 0.84  | 0.842 |
| Arkansas                  | 0.783 | 0.787 | 0.79  | 0.794 | 0.796 | 0.799 | 0.803 | 0.807 | 0.809 | 0.811 |
| California                | 0.838 | 0.841 | 0.845 | 0.848 | 0.852 | 0.856 | 0.861 | 0.865 | 0.868 | 0.87  |
| Colorado                  | 0.847 | 0.851 | 0.855 | 0.859 | 0.863 | 0.867 | 0.871 | 0.874 | 0.876 | 0.877 |
| Connecticut               | 0.881 | 0.884 | 0.887 | 0.89  | 0.893 | 0.896 | 0.899 | 0.901 | 0.902 | 0.902 |
| Delaware                  | 0.843 | 0.847 | 0.85  | 0.852 | 0.854 | 0.857 | 0.859 | 0.861 | 0.862 | 0.863 |
| Washington, DC            | 0.876 | 0.877 | 0.879 | 0.88  | 0.881 | 0.883 | 0.884 | 0.886 | 0.886 | 0.886 |
| Florida                   | 0.832 | 0.836 | 0.839 | 0.842 | 0.844 | 0.846 | 0.85  | 0.852 | 0.854 | 0.856 |
| Georgia                   | 0.812 | 0.817 | 0.821 | 0.825 | 0.828 | 0.832 | 0.835 | 0.838 | 0.84  | 0.841 |
| Hawaii                    | 0.836 | 0.84  | 0.843 | 0.847 | 0.85  | 0.853 | 0.856 | 0.858 | 0.859 | 0.86  |
| Idaho                     | 0.807 | 0.81  | 0.813 | 0.815 | 0.817 | 0.82  | 0.823 | 0.825 | 0.827 | 0.827 |
| Illinois                  | 0.848 | 0.851 | 0.854 | 0.858 | 0.86  | 0.863 | 0.867 | 0.869 | 0.871 | 0.872 |
| Indiana                   | 0.812 | 0.816 | 0.819 | 0.823 | 0.826 | 0.829 | 0.833 | 0.835 | 0.837 | 0.838 |
| Iowa                      | 0.833 | 0.836 | 0.84  | 0.843 | 0.847 | 0.851 | 0.856 | 0.859 | 0.862 | 0.864 |
| Kansas                    | 0.822 | 0.826 | 0.83  | 0.835 | 0.84  | 0.845 | 0.85  | 0.854 | 0.857 | 0.858 |
| Kentucky                  | 0.79  | 0.794 | 0.797 | 0.8   | 0.803 | 0.806 | 0.81  | 0.812 | 0.814 | 0.815 |
| Louisiana                 | 0.794 | 0.798 | 0.801 | 0.805 | 0.808 | 0.812 | 0.817 | 0.82  | 0.822 | 0.823 |
| Maine                     | 0.84  | 0.842 | 0.845 | 0.848 | 0.85  | 0.853 | 0.856 | 0.858 | 0.86  | 0.862 |
| Maryland                  | 0.867 | 0.87  | 0.873 | 0.876 | 0.878 | 0.881 | 0.884 | 0.885 | 0.886 | 0.887 |
| Massachusetts             | 0.889 | 0.892 | 0.894 | 0.897 | 0.899 | 0.902 | 0.904 | 0.906 | 0.907 | 0.907 |
| Michigan                  | 0.836 | 0.838 | 0.84  | 0.843 | 0.845 | 0.849 | 0.854 | 0.858 | 0.861 | 0.863 |
| Minnesota                 | 0.86  | 0.863 | 0.866 | 0.87  | 0.873 | 0.876 | 0.879 | 0.882 | 0.884 | 0.886 |
| Mississippi               | 0.774 | 0.779 | 0.784 | 0.789 | 0.792 | 0.796 | 0.8   | 0.803 | 0.804 | 0.805 |
| Missouri                  | 0.818 | 0.821 | 0.825 | 0.828 | 0.831 | 0.834 | 0.838 | 0.841 | 0.843 | 0.844 |
| Montana                   | 0.823 | 0.826 | 0.829 | 0.833 | 0.837 | 0.842 | 0.847 | 0.851 | 0.854 | 0.856 |
| Nebraska                  | 0.833 | 0.836 | 0.84  | 0.845 | 0.849 | 0.853 | 0.857 | 0.86  | 0.862 | 0.862 |
| Nevada                    | 0.822 | 0.825 | 0.827 | 0.829 | 0.829 | 0.83  | 0.832 | 0.834 | 0.834 | 0.835 |
| New Hampshire             | 0.874 | 0.877 | 0.88  | 0.883 | 0.886 | 0.89  | 0.893 | 0.895 | 0.897 | 0.898 |
| New Jersey                | 0.872 | 0.875 | 0.878 | 0.88  | 0.883 | 0.886 | 0.888 | 0.89  | 0.892 | 0.892 |
| New Mexico                | 0.793 | 0.798 | 0.803 | 0.807 | 0.811 | 0.815 | 0.819 | 0.823 | 0.825 | 0.826 |
| New York                  | 0.863 | 0.866 | 0.869 | 0.872 | 0.875 | 0.878 | 0.881 | 0.883 | 0.884 | 0.884 |
| North Carolina            | 0.813 | 0.817 | 0.822 | 0.826 | 0.829 | 0.832 | 0.835 | 0.836 | 0.837 | 0.838 |
| North Dakota              | 0.832 | 0.835 | 0.84  | 0.846 | 0.853 | 0.861 | 0.868 | 0.873 | 0.876 | 0.876 |
| Ohio                      | 0.823 | 0.826 | 0.829 | 0.832 | 0.835 | 0.838 | 0.841 | 0.843 | 0.845 | 0.846 |
| Oklahoma                  | 0.793 | 0.797 | 0.801 | 0.805 | 0.808 | 0.813 | 0.818 | 0.823 | 0.826 | 0.827 |
| Oregon                    | 0.838 | 0.842 | 0.845 | 0.848 | 0.852 | 0.856 | 0.86  | 0.864 | 0.866 | 0.868 |
| Pennsylvania              | 0.846 | 0.849 | 0.852 | 0.855 | 0.857 | 0.861 | 0.864 | 0.866 | 0.868 | 0.87  |
| Rhode Island              | 0.86  | 0.863 | 0.866 | 0.869 | 0.872 | 0.875 | 0.877 | 0.879 | 0.881 | 0.882 |
| South Carolina            | 0.807 | 0.811 | 0.816 | 0.82  | 0.823 | 0.826 | 0.828 | 0.83  | 0.831 | 0.832 |
| South Dakota              | 0.817 | 0.82  | 0.824 | 0.828 | 0.833 | 0.838 | 0.843 | 0.847 | 0.849 | 0.85  |

|                               |       |       |       |       |       |       |       |       |       |       |
|-------------------------------|-------|-------|-------|-------|-------|-------|-------|-------|-------|-------|
| Tennessee                     | 0.795 | 0.8   | 0.805 | 0.81  | 0.815 | 0.82  | 0.823 | 0.826 | 0.827 | 0.827 |
| Texas                         | 0.794 | 0.799 | 0.803 | 0.808 | 0.812 | 0.818 | 0.824 | 0.83  | 0.833 | 0.835 |
| Utah                          | 0.818 | 0.822 | 0.827 | 0.831 | 0.834 | 0.839 | 0.843 | 0.847 | 0.849 | 0.851 |
| Vermont                       | 0.864 | 0.866 | 0.869 | 0.872 | 0.875 | 0.879 | 0.883 | 0.885 | 0.887 | 0.889 |
| Virginia                      | 0.854 | 0.858 | 0.861 | 0.864 | 0.867 | 0.869 | 0.872 | 0.874 | 0.876 | 0.877 |
| Washington                    | 0.85  | 0.853 | 0.856 | 0.86  | 0.863 | 0.866 | 0.87  | 0.873 | 0.875 | 0.876 |
| West Virginia                 | 0.783 | 0.786 | 0.789 | 0.793 | 0.797 | 0.802 | 0.806 | 0.809 | 0.811 | 0.812 |
| Wisconsin                     | 0.844 | 0.848 | 0.851 | 0.855 | 0.858 | 0.861 | 0.864 | 0.866 | 0.868 | 0.869 |
| Wyoming                       | 0.829 | 0.833 | 0.837 | 0.84  | 0.843 | 0.847 | 0.85  | 0.853 | 0.855 | 0.856 |
| Southern<br>Latin America     | 0.676 | 0.681 | 0.686 | 0.689 | 0.692 | 0.701 | 0.71  | 0.716 | 0.719 | 0.721 |
| Argentina                     | 0.665 | 0.67  | 0.674 | 0.677 | 0.679 | 0.687 | 0.696 | 0.702 | 0.706 | 0.708 |
| Chile                         | 0.706 | 0.712 | 0.719 | 0.724 | 0.728 | 0.738 | 0.747 | 0.753 | 0.756 | 0.759 |
| Uruguay                       | 0.653 | 0.658 | 0.663 | 0.668 | 0.673 | 0.678 | 0.684 | 0.688 | 0.693 | 0.697 |
| Western<br>Europe             | 0.817 | 0.821 | 0.824 | 0.827 | 0.83  | 0.832 | 0.835 | 0.838 | 0.841 | 0.843 |
| Andorra                       | 0.876 | 0.879 | 0.881 | 0.883 | 0.885 | 0.887 | 0.889 | 0.891 | 0.892 | 0.894 |
| Austria                       | 0.826 | 0.83  | 0.833 | 0.835 | 0.838 | 0.839 | 0.841 | 0.844 | 0.847 | 0.849 |
| Belgium                       | 0.82  | 0.824 | 0.829 | 0.834 | 0.837 | 0.841 | 0.843 | 0.846 | 0.849 | 0.851 |
| Cyprus                        | 0.82  | 0.824 | 0.827 | 0.829 | 0.831 | 0.832 | 0.834 | 0.836 | 0.838 | 0.841 |
| Denmark                       | 0.87  | 0.873 | 0.875 | 0.878 | 0.88  | 0.882 | 0.884 | 0.886 | 0.888 | 0.89  |
| Finland                       | 0.828 | 0.831 | 0.834 | 0.837 | 0.84  | 0.844 | 0.848 | 0.851 | 0.853 | 0.856 |
| France                        | 0.806 | 0.809 | 0.812 | 0.815 | 0.819 | 0.822 | 0.826 | 0.829 | 0.832 | 0.834 |
| Germany                       | 0.878 | 0.881 | 0.883 | 0.886 | 0.888 | 0.89  | 0.892 | 0.894 | 0.896 | 0.898 |
| Greece                        | 0.779 | 0.782 | 0.785 | 0.786 | 0.786 | 0.787 | 0.788 | 0.79  | 0.792 | 0.794 |
| Iceland                       | 0.846 | 0.847 | 0.847 | 0.848 | 0.85  | 0.854 | 0.858 | 0.863 | 0.866 | 0.869 |
| Ireland                       | 0.831 | 0.835 | 0.839 | 0.842 | 0.845 | 0.85  | 0.854 | 0.859 | 0.864 | 0.867 |
| Israel                        | 0.781 | 0.784 | 0.787 | 0.79  | 0.792 | 0.794 | 0.796 | 0.798 | 0.8   | 0.803 |
| Italy                         | 0.78  | 0.782 | 0.784 | 0.787 | 0.789 | 0.791 | 0.794 | 0.796 | 0.798 | 0.801 |
| Luxembourg                    | 0.872 | 0.874 | 0.877 | 0.88  | 0.883 | 0.886 | 0.889 | 0.892 | 0.894 | 0.895 |
| Malta                         | 0.764 | 0.768 | 0.772 | 0.775 | 0.779 | 0.784 | 0.788 | 0.793 | 0.797 | 0.801 |
| Monaco                        | 0.886 | 0.888 | 0.89  | 0.892 | 0.893 | 0.895 | 0.897 | 0.899 | 0.901 | 0.902 |
| Netherlands                   | 0.861 | 0.864 | 0.866 | 0.869 | 0.871 | 0.874 | 0.876 | 0.878 | 0.881 | 0.883 |
| Norway                        | 0.885 | 0.889 | 0.893 | 0.896 | 0.9   | 0.903 | 0.907 | 0.91  | 0.912 | 0.913 |
| Portugal                      | 0.709 | 0.714 | 0.718 | 0.722 | 0.726 | 0.729 | 0.732 | 0.736 | 0.739 | 0.743 |
| San Marino                    | 0.872 | 0.874 | 0.876 | 0.877 | 0.879 | 0.881 | 0.882 | 0.882 | 0.883 | 0.884 |
| Spain                         | 0.743 | 0.746 | 0.749 | 0.752 | 0.754 | 0.756 | 0.759 | 0.761 | 0.764 | 0.767 |
| Sweden                        | 0.849 | 0.852 | 0.855 | 0.858 | 0.86  | 0.863 | 0.865 | 0.868 | 0.87  | 0.872 |
| Stockholm                     | 0.886 | 0.889 | 0.891 | 0.893 | 0.895 | 0.897 | 0.899 | 0.901 | 0.903 | 0.904 |
| Sweden<br>except<br>Stockholm | 0.838 | 0.841 | 0.844 | 0.846 | 0.849 | 0.851 | 0.853 | 0.856 | 0.858 | 0.86  |
| Switzerland                   | 0.912 | 0.914 | 0.917 | 0.919 | 0.921 | 0.922 | 0.924 | 0.926 | 0.928 | 0.929 |
| UK                            | 0.816 | 0.82  | 0.825 | 0.83  | 0.834 | 0.837 | 0.839 | 0.842 | 0.845 | 0.847 |
| England                       | 0.82  | 0.823 | 0.828 | 0.833 | 0.837 | 0.84  | 0.842 | 0.845 | 0.848 | 0.85  |
| East<br>Midlands              | 0.796 | 0.8   | 0.804 | 0.809 | 0.813 | 0.816 | 0.819 | 0.821 | 0.824 | 0.826 |
| Derby                         | 0.805 | 0.809 | 0.814 | 0.821 | 0.825 | 0.829 | 0.832 | 0.835 | 0.838 | 0.841 |
| Derbyshire                    | 0.779 | 0.783 | 0.789 | 0.795 | 0.799 | 0.803 | 0.806 | 0.809 | 0.811 | 0.814 |
| Leicester                     | 0.797 | 0.801 | 0.805 | 0.809 | 0.812 | 0.815 | 0.817 | 0.819 | 0.821 | 0.823 |
| Leicestershire                | 0.819 | 0.822 | 0.826 | 0.83  | 0.833 | 0.835 | 0.838 | 0.84  | 0.842 | 0.845 |
| Lincolnshire                  | 0.777 | 0.781 | 0.786 | 0.791 | 0.795 | 0.799 | 0.802 | 0.804 | 0.807 | 0.81  |

|                        |       |       |       |       |       |       |       |       |       |       |
|------------------------|-------|-------|-------|-------|-------|-------|-------|-------|-------|-------|
| Northamptonshire       | 0.795 | 0.799 | 0.804 | 0.81  | 0.814 | 0.817 | 0.82  | 0.822 | 0.825 | 0.827 |
| Nottingham             | 0.828 | 0.832 | 0.836 | 0.84  | 0.842 | 0.844 | 0.846 | 0.848 | 0.85  | 0.852 |
| Nottinghamshire        | 0.781 | 0.784 | 0.789 | 0.794 | 0.797 | 0.8   | 0.803 | 0.806 | 0.809 | 0.811 |
| Rutland                | 0.821 | 0.824 | 0.827 | 0.831 | 0.834 | 0.836 | 0.838 | 0.84  | 0.842 | 0.844 |
| East of England        | 0.814 | 0.817 | 0.822 | 0.827 | 0.83  | 0.833 | 0.836 | 0.839 | 0.841 | 0.844 |
| Bedford                | 0.818 | 0.821 | 0.825 | 0.83  | 0.834 | 0.836 | 0.839 | 0.842 | 0.844 | 0.847 |
| Cambridgeshire         | 0.851 | 0.854 | 0.858 | 0.862 | 0.865 | 0.868 | 0.87  | 0.872 | 0.875 | 0.877 |
| Central Bedfordshire   | 0.811 | 0.815 | 0.819 | 0.824 | 0.827 | 0.83  | 0.833 | 0.836 | 0.839 | 0.841 |
| Essex                  | 0.805 | 0.809 | 0.813 | 0.817 | 0.821 | 0.823 | 0.825 | 0.828 | 0.83  | 0.833 |
| Hertfordshire          | 0.851 | 0.854 | 0.857 | 0.862 | 0.865 | 0.867 | 0.87  | 0.872 | 0.875 | 0.877 |
| Luton                  | 0.803 | 0.807 | 0.812 | 0.817 | 0.82  | 0.823 | 0.825 | 0.828 | 0.83  | 0.832 |
| Norfolk                | 0.793 | 0.796 | 0.801 | 0.806 | 0.81  | 0.813 | 0.815 | 0.818 | 0.821 | 0.823 |
| Peterborough           | 0.78  | 0.785 | 0.791 | 0.798 | 0.802 | 0.806 | 0.809 | 0.813 | 0.816 | 0.818 |
| Southend-on-Sea        | 0.783 | 0.787 | 0.792 | 0.797 | 0.8   | 0.803 | 0.805 | 0.807 | 0.81  | 0.812 |
| Suffolk                | 0.794 | 0.799 | 0.804 | 0.81  | 0.813 | 0.816 | 0.819 | 0.822 | 0.824 | 0.827 |
| Thurrock               | 0.776 | 0.78  | 0.784 | 0.789 | 0.792 | 0.794 | 0.796 | 0.799 | 0.801 | 0.804 |
| Greater London         | 0.871 | 0.874 | 0.878 | 0.883 | 0.886 | 0.888 | 0.89  | 0.892 | 0.894 | 0.895 |
| Barking and Dagenham   | 0.751 | 0.756 | 0.761 | 0.768 | 0.773 | 0.777 | 0.78  | 0.783 | 0.787 | 0.79  |
| Barnet                 | 0.852 | 0.855 | 0.859 | 0.863 | 0.866 | 0.869 | 0.872 | 0.874 | 0.876 | 0.878 |
| Bexley                 | 0.799 | 0.803 | 0.807 | 0.812 | 0.817 | 0.82  | 0.824 | 0.827 | 0.83  | 0.833 |
| Brent                  | 0.824 | 0.827 | 0.832 | 0.837 | 0.84  | 0.842 | 0.844 | 0.846 | 0.848 | 0.851 |
| Bromley                | 0.835 | 0.837 | 0.841 | 0.844 | 0.847 | 0.849 | 0.852 | 0.854 | 0.856 | 0.858 |
| Camden                 | 0.917 | 0.92  | 0.922 | 0.925 | 0.926 | 0.928 | 0.929 | 0.93  | 0.931 | 0.931 |
| Croydon                | 0.816 | 0.818 | 0.822 | 0.826 | 0.829 | 0.831 | 0.833 | 0.835 | 0.838 | 0.84  |
| Ealing                 | 0.842 | 0.845 | 0.849 | 0.854 | 0.858 | 0.862 | 0.865 | 0.868 | 0.87  | 0.872 |
| Enfield                | 0.806 | 0.81  | 0.815 | 0.82  | 0.823 | 0.826 | 0.829 | 0.831 | 0.834 | 0.836 |
| Greenwich              | 0.805 | 0.808 | 0.813 | 0.818 | 0.822 | 0.825 | 0.827 | 0.83  | 0.832 | 0.834 |
| Hackney                | 0.853 | 0.858 | 0.864 | 0.87  | 0.873 | 0.876 | 0.877 | 0.879 | 0.881 | 0.882 |
| Hammersmith and Fulham | 0.912 | 0.914 | 0.917 | 0.92  | 0.922 | 0.924 | 0.925 | 0.927 | 0.928 | 0.929 |
| Haringey               | 0.832 | 0.835 | 0.84  | 0.845 | 0.848 | 0.851 | 0.854 | 0.856 | 0.858 | 0.86  |
| Harrow                 | 0.834 | 0.836 | 0.839 | 0.843 | 0.845 | 0.847 | 0.848 | 0.85  | 0.852 | 0.854 |
| Havering               | 0.793 | 0.796 | 0.8   | 0.805 | 0.808 | 0.811 | 0.814 | 0.817 | 0.82  | 0.823 |
| Hillingdon             | 0.856 | 0.859 | 0.863 | 0.868 | 0.871 | 0.874 | 0.877 | 0.879 | 0.881 | 0.882 |
| Hounslow               | 0.85  | 0.854 | 0.858 | 0.864 | 0.869 | 0.873 | 0.876 | 0.88  | 0.883 | 0.885 |
| Islington              | 0.9   | 0.903 | 0.906 | 0.909 | 0.911 | 0.913 | 0.914 | 0.916 | 0.917 | 0.918 |
| Kensington and Chelsea | 0.926 | 0.929 | 0.931 | 0.934 | 0.935 | 0.937 | 0.938 | 0.939 | 0.94  | 0.941 |
| Kingston upon Thames   | 0.884 | 0.886 | 0.888 | 0.891 | 0.893 | 0.895 | 0.896 | 0.898 | 0.9   | 0.902 |
| Lambeth                | 0.878 | 0.881 | 0.886 | 0.89  | 0.894 | 0.897 | 0.899 | 0.902 | 0.904 | 0.906 |
| Lewisham               | 0.816 | 0.82  | 0.824 | 0.829 | 0.833 | 0.836 | 0.839 | 0.842 | 0.844 | 0.846 |
| Merton                 | 0.845 | 0.848 | 0.853 | 0.858 | 0.862 | 0.866 | 0.869 | 0.872 | 0.874 | 0.876 |
| Newham                 | 0.798 | 0.803 | 0.808 | 0.814 | 0.818 | 0.822 | 0.824 | 0.827 | 0.829 | 0.831 |
| Redbridge              | 0.813 | 0.816 | 0.82  | 0.825 | 0.828 | 0.831 | 0.834 | 0.836 | 0.839 | 0.841 |
| Richmond upon Thames   | 0.899 | 0.901 | 0.904 | 0.908 | 0.911 | 0.914 | 0.917 | 0.92  | 0.922 | 0.924 |
| Southwark              | 0.887 | 0.891 | 0.895 | 0.899 | 0.902 | 0.904 | 0.906 | 0.908 | 0.909 | 0.91  |
| Sutton                 | 0.819 | 0.822 | 0.826 | 0.831 | 0.835 | 0.838 | 0.841 | 0.844 | 0.847 | 0.849 |
| Tower Hamlets          | 0.873 | 0.877 | 0.881 | 0.885 | 0.888 | 0.89  | 0.892 | 0.893 | 0.895 | 0.896 |
| Waltham Forest         | 0.792 | 0.796 | 0.801 | 0.807 | 0.811 | 0.815 | 0.818 | 0.822 | 0.825 | 0.827 |

|                           |       |       |       |       |       |       |       |       |       |       |
|---------------------------|-------|-------|-------|-------|-------|-------|-------|-------|-------|-------|
| Wandsworth                | 0.899 | 0.901 | 0.904 | 0.907 | 0.909 | 0.911 | 0.913 | 0.915 | 0.916 | 0.918 |
| Westminster               | 0.914 | 0.916 | 0.919 | 0.922 | 0.924 | 0.925 | 0.927 | 0.928 | 0.929 | 0.93  |
| North East England        | 0.788 | 0.792 | 0.797 | 0.802 | 0.805 | 0.808 | 0.811 | 0.814 | 0.817 | 0.819 |
| County Durham             | 0.777 | 0.78  | 0.785 | 0.79  | 0.793 | 0.796 | 0.798 | 0.801 | 0.803 | 0.805 |
| Darlington                | 0.791 | 0.796 | 0.801 | 0.807 | 0.812 | 0.815 | 0.818 | 0.821 | 0.824 | 0.826 |
| Gateshead                 | 0.79  | 0.794 | 0.799 | 0.805 | 0.809 | 0.812 | 0.815 | 0.817 | 0.82  | 0.822 |
| Hartlepool                | 0.749 | 0.753 | 0.759 | 0.766 | 0.771 | 0.774 | 0.778 | 0.781 | 0.784 | 0.786 |
| Middlesbrough             | 0.765 | 0.769 | 0.774 | 0.78  | 0.783 | 0.786 | 0.788 | 0.791 | 0.793 | 0.796 |
| Newcastle upon Tyne       | 0.846 | 0.849 | 0.853 | 0.856 | 0.858 | 0.86  | 0.861 | 0.863 | 0.865 | 0.866 |
| North Tyneside            | 0.793 | 0.797 | 0.802 | 0.808 | 0.812 | 0.815 | 0.818 | 0.821 | 0.824 | 0.826 |
| Northumberland            | 0.784 | 0.787 | 0.792 | 0.797 | 0.801 | 0.804 | 0.807 | 0.809 | 0.812 | 0.814 |
| Redcar and Cleveland      | 0.756 | 0.76  | 0.765 | 0.772 | 0.776 | 0.78  | 0.783 | 0.786 | 0.789 | 0.791 |
| South Tyneside            | 0.756 | 0.76  | 0.766 | 0.772 | 0.776 | 0.78  | 0.783 | 0.786 | 0.789 | 0.792 |
| Stockton-on-Tees          | 0.791 | 0.795 | 0.8   | 0.805 | 0.809 | 0.812 | 0.815 | 0.817 | 0.82  | 0.822 |
| Sunderland                | 0.777 | 0.781 | 0.786 | 0.792 | 0.796 | 0.799 | 0.802 | 0.805 | 0.807 | 0.81  |
| North West England        | 0.8   | 0.804 | 0.809 | 0.815 | 0.819 | 0.822 | 0.825 | 0.827 | 0.83  | 0.832 |
| Blackburn with Darwen     | 0.755 | 0.761 | 0.767 | 0.775 | 0.78  | 0.785 | 0.789 | 0.792 | 0.795 | 0.798 |
| Blackpool                 | 0.737 | 0.741 | 0.746 | 0.753 | 0.757 | 0.76  | 0.763 | 0.766 | 0.769 | 0.772 |
| Bolton                    | 0.766 | 0.77  | 0.775 | 0.782 | 0.786 | 0.789 | 0.792 | 0.795 | 0.797 | 0.8   |
| Bury                      | 0.784 | 0.788 | 0.793 | 0.8   | 0.804 | 0.808 | 0.811 | 0.814 | 0.817 | 0.819 |
| Cheshire East             | 0.838 | 0.842 | 0.847 | 0.852 | 0.856 | 0.86  | 0.863 | 0.865 | 0.868 | 0.87  |
| Cheshire West and Chester | 0.834 | 0.837 | 0.842 | 0.847 | 0.85  | 0.853 | 0.855 | 0.858 | 0.86  | 0.862 |
| Cumbria                   | 0.793 | 0.797 | 0.803 | 0.81  | 0.815 | 0.819 | 0.822 | 0.825 | 0.828 | 0.83  |
| Halton                    | 0.778 | 0.783 | 0.789 | 0.797 | 0.802 | 0.806 | 0.81  | 0.813 | 0.817 | 0.819 |
| Knowsley                  | 0.762 | 0.766 | 0.772 | 0.779 | 0.783 | 0.787 | 0.79  | 0.794 | 0.797 | 0.8   |
| Lancashire                | 0.801 | 0.805 | 0.81  | 0.815 | 0.819 | 0.822 | 0.824 | 0.827 | 0.829 | 0.831 |
| Liverpool                 | 0.821 | 0.824 | 0.827 | 0.831 | 0.833 | 0.835 | 0.836 | 0.838 | 0.84  | 0.842 |
| Manchester                | 0.848 | 0.852 | 0.856 | 0.86  | 0.863 | 0.865 | 0.867 | 0.869 | 0.872 | 0.873 |
| Oldham                    | 0.744 | 0.749 | 0.755 | 0.762 | 0.766 | 0.77  | 0.773 | 0.776 | 0.779 | 0.781 |
| Rochdale                  | 0.753 | 0.757 | 0.763 | 0.77  | 0.774 | 0.778 | 0.781 | 0.784 | 0.787 | 0.79  |
| Salford                   | 0.793 | 0.798 | 0.803 | 0.81  | 0.814 | 0.817 | 0.82  | 0.822 | 0.825 | 0.827 |
| Sefton                    | 0.789 | 0.792 | 0.795 | 0.799 | 0.802 | 0.804 | 0.806 | 0.808 | 0.81  | 0.812 |
| St Helens                 | 0.765 | 0.769 | 0.774 | 0.78  | 0.784 | 0.787 | 0.789 | 0.792 | 0.794 | 0.797 |
| Stockport                 | 0.82  | 0.824 | 0.828 | 0.834 | 0.837 | 0.84  | 0.843 | 0.845 | 0.848 | 0.85  |
| Tameside                  | 0.757 | 0.76  | 0.766 | 0.772 | 0.776 | 0.779 | 0.782 | 0.785 | 0.788 | 0.79  |
| Trafford                  | 0.851 | 0.854 | 0.859 | 0.864 | 0.867 | 0.871 | 0.874 | 0.876 | 0.879 | 0.881 |
| Warrington                | 0.83  | 0.834 | 0.84  | 0.846 | 0.85  | 0.854 | 0.858 | 0.861 | 0.864 | 0.866 |
| Wigan                     | 0.759 | 0.763 | 0.769 | 0.775 | 0.779 | 0.782 | 0.785 | 0.788 | 0.791 | 0.793 |
| Wirral                    | 0.774 | 0.777 | 0.783 | 0.788 | 0.792 | 0.796 | 0.798 | 0.801 | 0.804 | 0.806 |
| South East England        | 0.838 | 0.841 | 0.845 | 0.85  | 0.853 | 0.855 | 0.858 | 0.86  | 0.862 | 0.864 |
| Bracknell Forest          | 0.849 | 0.852 | 0.857 | 0.861 | 0.865 | 0.868 | 0.871 | 0.873 | 0.876 | 0.878 |
| Brighton and Hove         | 0.871 | 0.873 | 0.876 | 0.879 | 0.881 | 0.883 | 0.885 | 0.887 | 0.889 | 0.891 |
| Buckinghamshire           | 0.853 | 0.856 | 0.86  | 0.864 | 0.866 | 0.869 | 0.871 | 0.873 | 0.875 | 0.877 |
| East Sussex               | 0.795 | 0.799 | 0.803 | 0.809 | 0.812 | 0.816 | 0.819 | 0.822 | 0.825 | 0.827 |
| Hampshire                 | 0.833 | 0.836 | 0.841 | 0.846 | 0.85  | 0.853 | 0.855 | 0.858 | 0.86  | 0.862 |
| Isle of Wight             | 0.778 | 0.781 | 0.785 | 0.79  | 0.793 | 0.796 | 0.798 | 0.8   | 0.803 | 0.805 |
| Kent                      | 0.805 | 0.808 | 0.813 | 0.818 | 0.821 | 0.824 | 0.826 | 0.828 | 0.831 | 0.833 |

|                              |       |       |       |       |       |       |       |       |       |       |
|------------------------------|-------|-------|-------|-------|-------|-------|-------|-------|-------|-------|
| Medway                       | 0.78  | 0.783 | 0.788 | 0.792 | 0.796 | 0.798 | 0.8   | 0.802 | 0.805 | 0.807 |
| Milton Keynes                | 0.834 | 0.838 | 0.844 | 0.85  | 0.855 | 0.859 | 0.862 | 0.866 | 0.869 | 0.87  |
| Oxfordshire                  | 0.864 | 0.867 | 0.871 | 0.875 | 0.878 | 0.881 | 0.883 | 0.886 | 0.888 | 0.89  |
| Portsmouth                   | 0.836 | 0.839 | 0.842 | 0.846 | 0.849 | 0.85  | 0.852 | 0.854 | 0.856 | 0.858 |
| Reading                      | 0.878 | 0.88  | 0.883 | 0.886 | 0.889 | 0.89  | 0.891 | 0.893 | 0.894 | 0.896 |
| Slough                       | 0.831 | 0.835 | 0.841 | 0.847 | 0.851 | 0.854 | 0.857 | 0.86  | 0.862 | 0.864 |
| Southampton                  | 0.837 | 0.839 | 0.841 | 0.844 | 0.846 | 0.848 | 0.849 | 0.851 | 0.853 | 0.855 |
| Surrey                       | 0.871 | 0.874 | 0.877 | 0.881 | 0.884 | 0.886 | 0.889 | 0.891 | 0.893 | 0.895 |
| West Berkshire               | 0.857 | 0.861 | 0.865 | 0.87  | 0.874 | 0.876 | 0.878 | 0.88  | 0.882 | 0.883 |
| West Sussex                  | 0.825 | 0.829 | 0.833 | 0.838 | 0.841 | 0.844 | 0.847 | 0.849 | 0.852 | 0.854 |
| Windsor and Maidenhead       | 0.877 | 0.88  | 0.884 | 0.889 | 0.892 | 0.895 | 0.898 | 0.9   | 0.903 | 0.905 |
| Wokingham                    | 0.883 | 0.885 | 0.887 | 0.891 | 0.893 | 0.896 | 0.898 | 0.9   | 0.902 | 0.904 |
| South West England           | 0.819 | 0.823 | 0.827 | 0.832 | 0.835 | 0.838 | 0.841 | 0.843 | 0.846 | 0.848 |
| Bath and North East Somerset | 0.865 | 0.868 | 0.871 | 0.874 | 0.876 | 0.878 | 0.88  | 0.882 | 0.884 | 0.886 |
| Bournemouth                  | 0.838 | 0.84  | 0.844 | 0.847 | 0.85  | 0.852 | 0.854 | 0.856 | 0.858 | 0.861 |
| Bristol, City of             | 0.861 | 0.864 | 0.868 | 0.872 | 0.875 | 0.877 | 0.88  | 0.882 | 0.884 | 0.886 |
| Cornwall                     | 0.796 | 0.799 | 0.804 | 0.809 | 0.812 | 0.815 | 0.818 | 0.82  | 0.823 | 0.825 |
| Devon                        | 0.817 | 0.821 | 0.825 | 0.829 | 0.832 | 0.835 | 0.837 | 0.839 | 0.841 | 0.843 |
| Dorset                       | 0.805 | 0.808 | 0.813 | 0.818 | 0.822 | 0.825 | 0.827 | 0.83  | 0.833 | 0.835 |
| Gloucestershire              | 0.829 | 0.833 | 0.837 | 0.842 | 0.846 | 0.849 | 0.852 | 0.855 | 0.857 | 0.859 |
| North Somerset               | 0.81  | 0.814 | 0.819 | 0.825 | 0.829 | 0.833 | 0.836 | 0.838 | 0.841 | 0.843 |
| Plymouth                     | 0.809 | 0.812 | 0.816 | 0.821 | 0.824 | 0.826 | 0.828 | 0.83  | 0.832 | 0.834 |
| Poole                        | 0.819 | 0.823 | 0.828 | 0.833 | 0.837 | 0.84  | 0.843 | 0.846 | 0.848 | 0.85  |
| Somerset                     | 0.794 | 0.798 | 0.802 | 0.808 | 0.812 | 0.815 | 0.818 | 0.821 | 0.824 | 0.826 |
| South Gloucestershire        | 0.843 | 0.847 | 0.851 | 0.856 | 0.86  | 0.863 | 0.865 | 0.868 | 0.871 | 0.873 |
| Swindon                      | 0.821 | 0.825 | 0.83  | 0.835 | 0.839 | 0.842 | 0.844 | 0.846 | 0.849 | 0.85  |
| Torbay                       | 0.765 | 0.768 | 0.772 | 0.777 | 0.78  | 0.782 | 0.785 | 0.787 | 0.79  | 0.793 |
| Wiltshire                    | 0.811 | 0.815 | 0.82  | 0.825 | 0.829 | 0.833 | 0.836 | 0.839 | 0.841 | 0.844 |
| West Midlands                | 0.792 | 0.796 | 0.801 | 0.807 | 0.811 | 0.814 | 0.817 | 0.82  | 0.823 | 0.825 |
| Birmingham                   | 0.797 | 0.801 | 0.806 | 0.811 | 0.815 | 0.818 | 0.82  | 0.823 | 0.825 | 0.827 |
| Coventry                     | 0.81  | 0.813 | 0.818 | 0.823 | 0.826 | 0.829 | 0.832 | 0.835 | 0.837 | 0.84  |
| Dudley                       | 0.76  | 0.763 | 0.768 | 0.773 | 0.777 | 0.779 | 0.782 | 0.785 | 0.788 | 0.79  |
| Herefordshire, County of     | 0.796 | 0.8   | 0.805 | 0.811 | 0.816 | 0.819 | 0.823 | 0.826 | 0.829 | 0.832 |
| Sandwell                     | 0.741 | 0.746 | 0.752 | 0.759 | 0.764 | 0.768 | 0.772 | 0.775 | 0.778 | 0.781 |
| Shropshire                   | 0.802 | 0.806 | 0.81  | 0.815 | 0.819 | 0.822 | 0.825 | 0.827 | 0.83  | 0.832 |
| Solihull                     | 0.827 | 0.83  | 0.834 | 0.839 | 0.842 | 0.846 | 0.849 | 0.852 | 0.855 | 0.858 |
| Staffordshire                | 0.793 | 0.797 | 0.801 | 0.805 | 0.808 | 0.811 | 0.813 | 0.815 | 0.817 | 0.819 |
| Stoke-on-Trent               | 0.745 | 0.75  | 0.756 | 0.764 | 0.769 | 0.773 | 0.776 | 0.78  | 0.783 | 0.786 |
| Telford and Wrekin           | 0.778 | 0.782 | 0.787 | 0.794 | 0.798 | 0.801 | 0.804 | 0.807 | 0.81  | 0.813 |
| Walsall                      | 0.74  | 0.745 | 0.751 | 0.758 | 0.762 | 0.766 | 0.77  | 0.773 | 0.776 | 0.779 |
| Warwickshire                 | 0.825 | 0.829 | 0.834 | 0.839 | 0.843 | 0.846 | 0.849 | 0.852 | 0.855 | 0.857 |
| Wolverhampton                | 0.764 | 0.768 | 0.774 | 0.78  | 0.784 | 0.787 | 0.79  | 0.793 | 0.796 | 0.799 |
| Worcestershire               | 0.802 | 0.805 | 0.809 | 0.814 | 0.818 | 0.82  | 0.823 | 0.826 | 0.828 | 0.831 |
| Yorkshire and the Humber     | 0.793 | 0.797 | 0.802 | 0.808 | 0.812 | 0.815 | 0.818 | 0.821 | 0.823 | 0.826 |
| Barnsley                     | 0.737 | 0.741 | 0.746 | 0.753 | 0.758 | 0.761 | 0.765 | 0.768 | 0.771 | 0.774 |
| Bradford                     | 0.761 | 0.766 | 0.773 | 0.78  | 0.784 | 0.788 | 0.791 | 0.794 | 0.797 | 0.8   |

|                                  |       |       |       |       |       |       |       |       |       |       |
|----------------------------------|-------|-------|-------|-------|-------|-------|-------|-------|-------|-------|
| Calderdale                       | 0.783 | 0.788 | 0.794 | 0.802 | 0.806 | 0.81  | 0.813 | 0.816 | 0.819 | 0.821 |
| Doncaster                        | 0.743 | 0.748 | 0.754 | 0.761 | 0.766 | 0.77  | 0.774 | 0.777 | 0.781 | 0.783 |
| East Riding of Yorkshire         | 0.794 | 0.798 | 0.802 | 0.806 | 0.81  | 0.812 | 0.814 | 0.817 | 0.819 | 0.821 |
| Kingston upon Hull, City of      | 0.764 | 0.768 | 0.772 | 0.778 | 0.781 | 0.783 | 0.785 | 0.787 | 0.79  | 0.792 |
| Kirklees                         | 0.777 | 0.782 | 0.787 | 0.793 | 0.797 | 0.8   | 0.803 | 0.805 | 0.808 | 0.81  |
| Leeds                            | 0.838 | 0.842 | 0.845 | 0.849 | 0.853 | 0.855 | 0.858 | 0.86  | 0.862 | 0.864 |
| North East Lincolnshire          | 0.746 | 0.751 | 0.757 | 0.764 | 0.768 | 0.771 | 0.774 | 0.778 | 0.781 | 0.784 |
| North Lincolnshire               | 0.781 | 0.785 | 0.79  | 0.796 | 0.799 | 0.8   | 0.801 | 0.803 | 0.805 | 0.806 |
| North Yorkshire                  | 0.811 | 0.815 | 0.819 | 0.824 | 0.827 | 0.83  | 0.832 | 0.834 | 0.836 | 0.838 |
| Rotherham                        | 0.75  | 0.754 | 0.76  | 0.766 | 0.77  | 0.773 | 0.775 | 0.778 | 0.781 | 0.784 |
| Sheffield                        | 0.822 | 0.826 | 0.83  | 0.834 | 0.837 | 0.84  | 0.842 | 0.844 | 0.847 | 0.848 |
| Wakefield                        | 0.755 | 0.76  | 0.765 | 0.772 | 0.777 | 0.78  | 0.783 | 0.786 | 0.789 | 0.792 |
| York                             | 0.863 | 0.865 | 0.868 | 0.871 | 0.873 | 0.875 | 0.877 | 0.879 | 0.881 | 0.883 |
| Northern Ireland                 | 0.792 | 0.796 | 0.802 | 0.808 | 0.811 | 0.815 | 0.818 | 0.821 | 0.823 | 0.825 |
| Scotland                         | 0.805 | 0.809 | 0.814 | 0.819 | 0.823 | 0.826 | 0.828 | 0.831 | 0.833 | 0.834 |
| Wales                            | 0.788 | 0.792 | 0.797 | 0.802 | 0.806 | 0.809 | 0.812 | 0.815 | 0.818 | 0.82  |
| Latin America and Caribbean      | 0.589 | 0.594 | 0.6   | 0.605 | 0.611 | 0.616 | 0.62  | 0.625 | 0.629 | 0.633 |
| Andean Latin America             | 0.585 | 0.591 | 0.596 | 0.602 | 0.608 | 0.613 | 0.618 | 0.624 | 0.628 | 0.632 |
| Bolivia                          | 0.521 | 0.525 | 0.528 | 0.533 | 0.538 | 0.544 | 0.55  | 0.556 | 0.562 | 0.566 |
| Ecuador                          | 0.591 | 0.597 | 0.603 | 0.609 | 0.615 | 0.621 | 0.626 | 0.632 | 0.636 | 0.64  |
| Peru                             | 0.601 | 0.608 | 0.614 | 0.62  | 0.625 | 0.63  | 0.635 | 0.64  | 0.645 | 0.648 |
| Caribbean                        | 0.598 | 0.601 | 0.605 | 0.609 | 0.612 | 0.616 | 0.621 | 0.625 | 0.628 | 0.631 |
| Antigua and Barbuda              | 0.709 | 0.713 | 0.716 | 0.719 | 0.723 | 0.727 | 0.731 | 0.735 | 0.739 | 0.743 |
| The Bahamas                      | 0.774 | 0.779 | 0.78  | 0.782 | 0.784 | 0.786 | 0.789 | 0.791 | 0.794 | 0.796 |
| Barbados                         | 0.718 | 0.721 | 0.725 | 0.728 | 0.73  | 0.733 | 0.735 | 0.737 | 0.74  | 0.742 |
| Belize                           | 0.564 | 0.569 | 0.574 | 0.579 | 0.583 | 0.588 | 0.592 | 0.596 | 0.6   | 0.603 |
| Bermuda                          | 0.785 | 0.79  | 0.795 | 0.799 | 0.802 | 0.805 | 0.807 | 0.809 | 0.811 | 0.813 |
| Cuba                             | 0.62  | 0.624 | 0.631 | 0.636 | 0.64  | 0.645 | 0.653 | 0.66  | 0.665 | 0.668 |
| Dominica                         | 0.7   | 0.705 | 0.709 | 0.713 | 0.717 | 0.721 | 0.724 | 0.727 | 0.728 | 0.729 |
| Dominican Republic               | 0.544 | 0.549 | 0.554 | 0.559 | 0.563 | 0.569 | 0.574 | 0.58  | 0.587 | 0.592 |
| Grenada                          | 0.628 | 0.633 | 0.637 | 0.641 | 0.645 | 0.65  | 0.654 | 0.659 | 0.664 | 0.669 |
| Guyana                           | 0.565 | 0.571 | 0.577 | 0.583 | 0.59  | 0.596 | 0.602 | 0.608 | 0.614 | 0.618 |
| Haiti                            | 0.395 | 0.399 | 0.403 | 0.407 | 0.412 | 0.416 | 0.42  | 0.424 | 0.428 | 0.432 |
| Jamaica                          | 0.653 | 0.657 | 0.661 | 0.664 | 0.668 | 0.671 | 0.675 | 0.678 | 0.681 | 0.684 |
| Puerto Rico                      | 0.769 | 0.774 | 0.779 | 0.785 | 0.793 | 0.802 | 0.808 | 0.811 | 0.813 | 0.814 |
| Saint Kitts and Nevis            | 0.706 | 0.71  | 0.714 | 0.719 | 0.724 | 0.728 | 0.733 | 0.738 | 0.742 | 0.746 |
| Saint Lucia                      | 0.634 | 0.639 | 0.643 | 0.648 | 0.652 | 0.656 | 0.659 | 0.663 | 0.667 | 0.67  |
| Saint Vincent and the Grenadines | 0.589 | 0.593 | 0.598 | 0.602 | 0.606 | 0.61  | 0.615 | 0.619 | 0.623 | 0.627 |
| Suriname                         | 0.598 | 0.602 | 0.607 | 0.611 | 0.616 | 0.62  | 0.625 | 0.629 | 0.633 | 0.636 |
| Trinidad and Tobago              | 0.732 | 0.736 | 0.739 | 0.742 | 0.745 | 0.748 | 0.751 | 0.753 | 0.755 | 0.757 |
| Virgin Islands                   | 0.785 | 0.788 | 0.79  | 0.791 | 0.792 | 0.794 | 0.795 | 0.796 | 0.798 | 0.799 |
| Central Latin America            | 0.584 | 0.589 | 0.594 | 0.599 | 0.604 | 0.609 | 0.614 | 0.618 | 0.623 | 0.626 |
| Colombia                         | 0.574 | 0.582 | 0.589 | 0.596 | 0.603 | 0.609 | 0.616 | 0.622 | 0.628 | 0.633 |
| Costa Rica                       | 0.637 | 0.642 | 0.647 | 0.652 | 0.657 | 0.662 | 0.667 | 0.672 | 0.676 | 0.68  |
| El Salvador                      | 0.526 | 0.531 | 0.536 | 0.542 | 0.547 | 0.552 | 0.558 | 0.563 | 0.568 | 0.573 |
| Guatemala                        | 0.472 | 0.478 | 0.485 | 0.491 | 0.498 | 0.504 | 0.51  | 0.516 | 0.522 | 0.526 |



|                                 |       |       |       |       |       |       |       |       |       |       |
|---------------------------------|-------|-------|-------|-------|-------|-------|-------|-------|-------|-------|
| Honduras                        | 0.454 | 0.459 | 0.464 | 0.469 | 0.473 | 0.478 | 0.482 | 0.487 | 0.492 | 0.496 |
| Mexico                          | 0.608 | 0.613 | 0.617 | 0.621 | 0.626 | 0.631 | 0.636 | 0.64  | 0.645 | 0.649 |
| Aguascalientes                  | 0.633 | 0.637 | 0.641 | 0.646 | 0.65  | 0.655 | 0.66  | 0.664 | 0.669 | 0.673 |
| Baja California                 | 0.653 | 0.656 | 0.66  | 0.663 | 0.667 | 0.671 | 0.675 | 0.68  | 0.685 | 0.688 |
| Baja California Sur             | 0.653 | 0.658 | 0.662 | 0.666 | 0.67  | 0.675 | 0.68  | 0.684 | 0.689 | 0.693 |
| Campeche                        | 0.6   | 0.606 | 0.611 | 0.617 | 0.623 | 0.629 | 0.634 | 0.639 | 0.644 | 0.648 |
| Chiapas                         | 0.517 | 0.522 | 0.527 | 0.532 | 0.536 | 0.541 | 0.545 | 0.55  | 0.554 | 0.557 |
| Chihuahua                       | 0.617 | 0.62  | 0.623 | 0.627 | 0.632 | 0.637 | 0.643 | 0.648 | 0.654 | 0.659 |
| Coahuila                        | 0.625 | 0.628 | 0.631 | 0.634 | 0.639 | 0.644 | 0.648 | 0.653 | 0.658 | 0.663 |
| Colima                          | 0.642 | 0.646 | 0.65  | 0.654 | 0.659 | 0.664 | 0.669 | 0.673 | 0.678 | 0.682 |
| Durango                         | 0.571 | 0.575 | 0.58  | 0.585 | 0.591 | 0.596 | 0.602 | 0.608 | 0.614 | 0.618 |
| Guanajuato                      | 0.582 | 0.588 | 0.594 | 0.6   | 0.606 | 0.612 | 0.618 | 0.624 | 0.63  | 0.634 |
| Guerrero                        | 0.522 | 0.529 | 0.535 | 0.541 | 0.548 | 0.553 | 0.558 | 0.563 | 0.568 | 0.572 |
| Hidalgo                         | 0.559 | 0.565 | 0.571 | 0.577 | 0.584 | 0.59  | 0.596 | 0.601 | 0.606 | 0.611 |
| Jalisco                         | 0.625 | 0.629 | 0.634 | 0.638 | 0.643 | 0.647 | 0.652 | 0.657 | 0.661 | 0.665 |
| México                          | 0.625 | 0.629 | 0.632 | 0.636 | 0.64  | 0.644 | 0.648 | 0.652 | 0.657 | 0.66  |
| Mexico City                     | 0.697 | 0.7   | 0.704 | 0.708 | 0.712 | 0.716 | 0.72  | 0.724 | 0.729 | 0.732 |
| Michoacán de Ocampo             | 0.568 | 0.572 | 0.576 | 0.581 | 0.585 | 0.59  | 0.594 | 0.598 | 0.602 | 0.606 |
| Morelos                         | 0.617 | 0.621 | 0.624 | 0.628 | 0.632 | 0.637 | 0.641 | 0.646 | 0.65  | 0.654 |
| Nayarit                         | 0.603 | 0.607 | 0.612 | 0.617 | 0.621 | 0.626 | 0.63  | 0.635 | 0.639 | 0.643 |
| Nuevo León                      | 0.661 | 0.665 | 0.669 | 0.673 | 0.677 | 0.682 | 0.686 | 0.691 | 0.696 | 0.699 |
| Oaxaca                          | 0.528 | 0.534 | 0.54  | 0.545 | 0.55  | 0.555 | 0.561 | 0.566 | 0.571 | 0.574 |
| Puebla                          | 0.567 | 0.572 | 0.577 | 0.583 | 0.588 | 0.593 | 0.598 | 0.603 | 0.608 | 0.612 |
| Querétaro                       | 0.63  | 0.634 | 0.639 | 0.644 | 0.649 | 0.653 | 0.658 | 0.663 | 0.667 | 0.671 |
| Quintana Roo                    | 0.629 | 0.634 | 0.638 | 0.643 | 0.647 | 0.652 | 0.657 | 0.662 | 0.666 | 0.67  |
| San Luis Potosí                 | 0.59  | 0.596 | 0.602 | 0.607 | 0.612 | 0.617 | 0.622 | 0.626 | 0.631 | 0.635 |
| Sinaloa                         | 0.621 | 0.626 | 0.631 | 0.636 | 0.641 | 0.647 | 0.652 | 0.657 | 0.662 | 0.667 |
| Sonora                          | 0.645 | 0.649 | 0.653 | 0.658 | 0.662 | 0.668 | 0.673 | 0.678 | 0.683 | 0.687 |
| Tabasco                         | 0.592 | 0.597 | 0.602 | 0.608 | 0.613 | 0.619 | 0.624 | 0.629 | 0.634 | 0.638 |
| Tamaulipas                      | 0.624 | 0.628 | 0.632 | 0.636 | 0.641 | 0.647 | 0.652 | 0.657 | 0.662 | 0.666 |
| Tlaxcala                        | 0.601 | 0.605 | 0.61  | 0.614 | 0.619 | 0.623 | 0.628 | 0.632 | 0.636 | 0.64  |
| Veracruz de Ignacio de la Llave | 0.567 | 0.572 | 0.578 | 0.582 | 0.587 | 0.592 | 0.596 | 0.601 | 0.605 | 0.609 |
| Yucatán                         | 0.594 | 0.599 | 0.605 | 0.611 | 0.616 | 0.622 | 0.627 | 0.631 | 0.636 | 0.64  |
| Zacatecas                       | 0.587 | 0.591 | 0.595 | 0.599 | 0.604 | 0.609 | 0.615 | 0.62  | 0.625 | 0.63  |
| Nicaragua                       | 0.47  | 0.474 | 0.479 | 0.484 | 0.489 | 0.495 | 0.5   | 0.506 | 0.512 | 0.517 |
| Panama                          | 0.627 | 0.63  | 0.635 | 0.642 | 0.65  | 0.658 | 0.666 | 0.674 | 0.68  | 0.686 |
| Venezuela                       | 0.586 | 0.591 | 0.596 | 0.6   | 0.604 | 0.607 | 0.608 | 0.608 | 0.608 | 0.607 |
| Tropical Latin America          | 0.59  | 0.597 | 0.604 | 0.61  | 0.617 | 0.622 | 0.627 | 0.632 | 0.636 | 0.64  |
| Brazil                          | 0.59  | 0.597 | 0.603 | 0.61  | 0.616 | 0.622 | 0.627 | 0.632 | 0.636 | 0.64  |
| Acre                            | 0.501 | 0.509 | 0.518 | 0.526 | 0.533 | 0.54  | 0.547 | 0.552 | 0.558 | 0.562 |
| Alagoas                         | 0.461 | 0.469 | 0.477 | 0.485 | 0.492 | 0.498 | 0.504 | 0.509 | 0.514 | 0.518 |
| Amapá                           | 0.594 | 0.6   | 0.606 | 0.612 | 0.618 | 0.624 | 0.629 | 0.633 | 0.637 | 0.641 |
| Amazonas                        | 0.548 | 0.555 | 0.562 | 0.569 | 0.576 | 0.582 | 0.588 | 0.593 | 0.598 | 0.602 |
| Bahia                           | 0.505 | 0.514 | 0.521 | 0.529 | 0.536 | 0.542 | 0.548 | 0.553 | 0.558 | 0.562 |
| Ceará                           | 0.501 | 0.51  | 0.518 | 0.525 | 0.533 | 0.539 | 0.544 | 0.549 | 0.554 | 0.558 |
| Distrito Federal                | 0.732 | 0.739 | 0.745 | 0.751 | 0.756 | 0.761 | 0.766 | 0.77  | 0.774 | 0.777 |
| Espírito Santo                  | 0.607 | 0.614 | 0.622 | 0.629 | 0.636 | 0.642 | 0.647 | 0.652 | 0.657 | 0.66  |

|                              |       |       |       |       |       |       |       |       |       |       |
|------------------------------|-------|-------|-------|-------|-------|-------|-------|-------|-------|-------|
| Goiás                        | 0.573 | 0.581 | 0.588 | 0.596 | 0.603 | 0.609 | 0.614 | 0.619 | 0.624 | 0.628 |
| Maranhão                     | 0.376 | 0.385 | 0.394 | 0.403 | 0.412 | 0.42  | 0.427 | 0.433 | 0.439 | 0.444 |
| Mato Grosso                  | 0.587 | 0.595 | 0.603 | 0.61  | 0.617 | 0.623 | 0.629 | 0.634 | 0.638 | 0.642 |
| Mato Grosso do Sul           | 0.585 | 0.593 | 0.601 | 0.608 | 0.615 | 0.621 | 0.626 | 0.631 | 0.636 | 0.639 |
| Minas Gerais                 | 0.596 | 0.603 | 0.61  | 0.616 | 0.622 | 0.627 | 0.632 | 0.636 | 0.64  | 0.643 |
| Pará                         | 0.51  | 0.518 | 0.526 | 0.534 | 0.542 | 0.549 | 0.554 | 0.56  | 0.565 | 0.569 |
| Paraíba                      | 0.49  | 0.499 | 0.507 | 0.515 | 0.522 | 0.528 | 0.534 | 0.539 | 0.544 | 0.548 |
| Paraná                       | 0.615 | 0.621 | 0.628 | 0.634 | 0.64  | 0.645 | 0.65  | 0.654 | 0.659 | 0.662 |
| Pernambuco                   | 0.51  | 0.519 | 0.527 | 0.536 | 0.543 | 0.55  | 0.556 | 0.561 | 0.567 | 0.571 |
| Piauí                        | 0.448 | 0.457 | 0.466 | 0.474 | 0.482 | 0.489 | 0.494 | 0.5   | 0.505 | 0.509 |
| Rio de Janeiro               | 0.658 | 0.664 | 0.67  | 0.675 | 0.681 | 0.686 | 0.69  | 0.694 | 0.698 | 0.702 |
| Rio Grande do Norte          | 0.519 | 0.527 | 0.535 | 0.543 | 0.551 | 0.557 | 0.562 | 0.567 | 0.572 | 0.576 |
| Rio Grande do Sul            | 0.642 | 0.648 | 0.653 | 0.659 | 0.664 | 0.669 | 0.673 | 0.677 | 0.681 | 0.684 |
| Rondônia                     | 0.547 | 0.556 | 0.565 | 0.573 | 0.58  | 0.587 | 0.592 | 0.598 | 0.603 | 0.606 |
| Roraima                      | 0.55  | 0.558 | 0.566 | 0.575 | 0.582 | 0.589 | 0.595 | 0.601 | 0.606 | 0.61  |
| Santa Catarina               | 0.646 | 0.652 | 0.659 | 0.665 | 0.67  | 0.676 | 0.68  | 0.684 | 0.688 | 0.691 |
| São Paulo                    | 0.658 | 0.663 | 0.669 | 0.675 | 0.68  | 0.686 | 0.69  | 0.694 | 0.698 | 0.702 |
| Sergipe                      | 0.532 | 0.539 | 0.546 | 0.553 | 0.56  | 0.566 | 0.57  | 0.575 | 0.579 | 0.583 |
| Tocantins                    | 0.514 | 0.524 | 0.534 | 0.544 | 0.552 | 0.56  | 0.567 | 0.573 | 0.579 | 0.583 |
| Paraguay                     | 0.582 | 0.588 | 0.594 | 0.601 | 0.608 | 0.615 | 0.621 | 0.627 | 0.633 | 0.638 |
| North Africa and Middle East | 0.595 | 0.603 | 0.611 | 0.619 | 0.626 | 0.633 | 0.64  | 0.647 | 0.654 | 0.66  |
| North Africa and Middle East | 0.595 | 0.603 | 0.611 | 0.619 | 0.626 | 0.633 | 0.64  | 0.647 | 0.654 | 0.66  |
| Afghanistan                  | 0.264 | 0.274 | 0.285 | 0.295 | 0.304 | 0.313 | 0.321 | 0.329 | 0.337 | 0.343 |
| Algeria                      | 0.599 | 0.605 | 0.611 | 0.617 | 0.623 | 0.628 | 0.634 | 0.64  | 0.646 | 0.652 |
| Bahrain                      | 0.711 | 0.715 | 0.72  | 0.726 | 0.731 | 0.735 | 0.739 | 0.743 | 0.747 | 0.751 |
| Egypt                        | 0.582 | 0.591 | 0.6   | 0.609 | 0.617 | 0.626 | 0.635 | 0.643 | 0.651 | 0.658 |
| Iran                         | 0.622 | 0.63  | 0.635 | 0.64  | 0.645 | 0.649 | 0.654 | 0.659 | 0.665 | 0.67  |
| Iraq                         | 0.57  | 0.583 | 0.597 | 0.61  | 0.622 | 0.632 | 0.644 | 0.654 | 0.663 | 0.671 |
| Jordan                       | 0.681 | 0.688 | 0.695 | 0.702 | 0.707 | 0.713 | 0.718 | 0.723 | 0.727 | 0.731 |
| Kuwait                       | 0.801 | 0.808 | 0.815 | 0.822 | 0.828 | 0.834 | 0.839 | 0.844 | 0.848 | 0.851 |
| Lebanon                      | 0.639 | 0.649 | 0.66  | 0.67  | 0.677 | 0.685 | 0.691 | 0.698 | 0.704 | 0.708 |
| Libya                        | 0.691 | 0.695 | 0.703 | 0.707 | 0.707 | 0.707 | 0.705 | 0.705 | 0.707 | 0.709 |
| Morocco                      | 0.475 | 0.483 | 0.491 | 0.499 | 0.508 | 0.516 | 0.524 | 0.533 | 0.541 | 0.548 |
| Oman                         | 0.715 | 0.726 | 0.737 | 0.747 | 0.754 | 0.76  | 0.767 | 0.773 | 0.778 | 0.783 |
| Palestine                    | 0.497 | 0.509 | 0.521 | 0.533 | 0.543 | 0.553 | 0.564 | 0.573 | 0.582 | 0.588 |
| Qatar                        | 0.772 | 0.779 | 0.786 | 0.793 | 0.799 | 0.806 | 0.812 | 0.818 | 0.825 | 0.83  |
| Saudi Arabia                 | 0.726 | 0.738 | 0.75  | 0.76  | 0.769 | 0.778 | 0.786 | 0.793 | 0.8   | 0.805 |
| Sudan                        | 0.416 | 0.428 | 0.44  | 0.451 | 0.462 | 0.474 | 0.485 | 0.497 | 0.507 | 0.515 |
| Syria                        | 0.594 | 0.601 | 0.605 | 0.606 | 0.607 | 0.608 | 0.61  | 0.613 | 0.616 | 0.619 |
| Tunisia                      | 0.622 | 0.628 | 0.634 | 0.64  | 0.646 | 0.651 | 0.657 | 0.662 | 0.667 | 0.672 |
| Turkey                       | 0.68  | 0.689 | 0.698 | 0.707 | 0.715 | 0.723 | 0.729 | 0.736 | 0.743 | 0.748 |
| United Arab Emirates         | 0.853 | 0.859 | 0.863 | 0.868 | 0.87  | 0.872 | 0.874 | 0.876 | 0.879 | 0.88  |
| Yemen                        | 0.366 | 0.375 | 0.384 | 0.393 | 0.402 | 0.407 | 0.41  | 0.412 | 0.413 | 0.412 |
| South Asia                   | 0.456 | 0.465 | 0.475 | 0.485 | 0.495 | 0.505 | 0.515 | 0.525 | 0.535 | 0.543 |
| South Asia                   | 0.456 | 0.465 | 0.475 | 0.485 | 0.495 | 0.505 | 0.515 | 0.525 | 0.535 | 0.543 |
| Bangladesh                   | 0.408 | 0.416 | 0.425 | 0.433 | 0.441 | 0.449 | 0.457 | 0.466 | 0.475 | 0.483 |

|                                        |       |       |       |       |       |       |       |       |       |       |
|----------------------------------------|-------|-------|-------|-------|-------|-------|-------|-------|-------|-------|
| Bhutan                                 | 0.384 | 0.394 | 0.403 | 0.411 | 0.419 | 0.426 | 0.434 | 0.442 | 0.449 | 0.455 |
| India                                  | 0.473 | 0.483 | 0.493 | 0.504 | 0.515 | 0.526 | 0.537 | 0.547 | 0.558 | 0.566 |
| Andhra Pradesh                         | 0.451 | 0.461 | 0.471 | 0.481 | 0.492 | 0.504 | 0.515 | 0.527 | 0.537 | 0.546 |
| Arunachal Pradesh                      | 0.469 | 0.481 | 0.492 | 0.503 | 0.515 | 0.526 | 0.537 | 0.548 | 0.558 | 0.566 |
| Assam                                  | 0.467 | 0.476 | 0.484 | 0.493 | 0.502 | 0.512 | 0.522 | 0.532 | 0.542 | 0.551 |
| Bihar                                  | 0.346 | 0.356 | 0.367 | 0.378 | 0.389 | 0.4   | 0.412 | 0.423 | 0.434 | 0.444 |
| Chhattisgarh                           | 0.436 | 0.447 | 0.458 | 0.469 | 0.48  | 0.492 | 0.503 | 0.514 | 0.524 | 0.533 |
| Delhi                                  | 0.634 | 0.643 | 0.652 | 0.661 | 0.671 | 0.682 | 0.692 | 0.701 | 0.71  | 0.717 |
| Goa                                    | 0.655 | 0.663 | 0.669 | 0.676 | 0.682 | 0.689 | 0.697 | 0.704 | 0.711 | 0.717 |
| Gujarat                                | 0.515 | 0.524 | 0.534 | 0.545 | 0.557 | 0.569 | 0.58  | 0.591 | 0.601 | 0.609 |
| Haryana                                | 0.506 | 0.518 | 0.53  | 0.542 | 0.555 | 0.567 | 0.579 | 0.59  | 0.601 | 0.609 |
| Himachal Pradesh                       | 0.544 | 0.555 | 0.566 | 0.577 | 0.588 | 0.599 | 0.61  | 0.62  | 0.63  | 0.638 |
| Jammu and Kashmir                      | 0.518 | 0.529 | 0.539 | 0.549 | 0.558 | 0.568 | 0.578 | 0.587 | 0.596 | 0.605 |
| Jharkhand                              | 0.415 | 0.426 | 0.437 | 0.448 | 0.46  | 0.47  | 0.481 | 0.491 | 0.501 | 0.51  |
| Karnataka                              | 0.496 | 0.506 | 0.518 | 0.529 | 0.541 | 0.554 | 0.566 | 0.578 | 0.589 | 0.598 |
| Kerala                                 | 0.587 | 0.595 | 0.604 | 0.614 | 0.625 | 0.636 | 0.646 | 0.655 | 0.664 | 0.671 |
| Madhya Pradesh                         | 0.405 | 0.415 | 0.425 | 0.436 | 0.448 | 0.46  | 0.472 | 0.484 | 0.495 | 0.505 |
| Maharashtra                            | 0.536 | 0.545 | 0.555 | 0.566 | 0.576 | 0.587 | 0.599 | 0.609 | 0.619 | 0.628 |
| Manipur                                | 0.527 | 0.534 | 0.541 | 0.548 | 0.556 | 0.564 | 0.572 | 0.58  | 0.588 | 0.595 |
| Meghalaya                              | 0.488 | 0.497 | 0.506 | 0.515 | 0.523 | 0.532 | 0.54  | 0.549 | 0.557 | 0.564 |
| Mizoram                                | 0.535 | 0.543 | 0.552 | 0.561 | 0.571 | 0.582 | 0.592 | 0.603 | 0.612 | 0.621 |
| Nagaland                               | 0.544 | 0.551 | 0.559 | 0.567 | 0.576 | 0.584 | 0.593 | 0.602 | 0.61  | 0.618 |
| Odisha                                 | 0.452 | 0.462 | 0.472 | 0.482 | 0.493 | 0.504 | 0.514 | 0.524 | 0.534 | 0.542 |
| Punjab                                 | 0.544 | 0.553 | 0.561 | 0.57  | 0.58  | 0.589 | 0.598 | 0.607 | 0.615 | 0.623 |
| Rajasthan                              | 0.415 | 0.427 | 0.439 | 0.451 | 0.464 | 0.476 | 0.489 | 0.501 | 0.512 | 0.521 |
| Sikkim                                 | 0.535 | 0.55  | 0.564 | 0.577 | 0.589 | 0.601 | 0.612 | 0.622 | 0.632 | 0.64  |
| Tamil Nadu                             | 0.528 | 0.538 | 0.548 | 0.558 | 0.57  | 0.582 | 0.593 | 0.603 | 0.613 | 0.621 |
| Telangana                              | 0.467 | 0.479 | 0.491 | 0.503 | 0.516 | 0.528 | 0.54  | 0.552 | 0.563 | 0.572 |
| Tripura                                | 0.486 | 0.493 | 0.499 | 0.507 | 0.515 | 0.523 | 0.532 | 0.541 | 0.549 | 0.557 |
| Union Territories other than Delhi     | 0.593 | 0.601 | 0.609 | 0.617 | 0.625 | 0.633 | 0.641 | 0.649 | 0.657 | 0.664 |
| Uttar Pradesh                          | 0.417 | 0.428 | 0.439 | 0.45  | 0.461 | 0.472 | 0.483 | 0.494 | 0.505 | 0.513 |
| Uttarakhand                            | 0.516 | 0.531 | 0.545 | 0.559 | 0.572 | 0.585 | 0.597 | 0.608 | 0.619 | 0.628 |
| West Bengal                            | 0.469 | 0.476 | 0.484 | 0.491 | 0.5   | 0.509 | 0.518 | 0.528 | 0.537 | 0.545 |
| Nepal                                  | 0.347 | 0.356 | 0.365 | 0.373 | 0.382 | 0.391 | 0.399 | 0.408 | 0.416 | 0.422 |
| Pakistan                               | 0.379 | 0.387 | 0.394 | 0.402 | 0.41  | 0.418 | 0.426 | 0.434 | 0.442 | 0.449 |
| Southeast Asia, east Asia, and Oceania | 0.614 | 0.622 | 0.629 | 0.636 | 0.643 | 0.647 | 0.651 | 0.659 | 0.667 | 0.673 |
| East Asia                              | 0.628 | 0.637 | 0.644 | 0.652 | 0.66  | 0.662 | 0.665 | 0.675 | 0.684 | 0.691 |
| China                                  | 0.621 | 0.631 | 0.638 | 0.646 | 0.654 | 0.657 | 0.659 | 0.669 | 0.679 | 0.686 |
| North Korea                            | 0.513 | 0.518 | 0.523 | 0.528 | 0.534 | 0.538 | 0.543 | 0.548 | 0.553 | 0.558 |
| Taiwan (province of China)             | 0.83  | 0.833 | 0.838 | 0.843 | 0.848 | 0.852 | 0.856 | 0.86  | 0.865 | 0.868 |
| Oceania                                | 0.426 | 0.428 | 0.431 | 0.433 | 0.436 | 0.44  | 0.443 | 0.446 | 0.449 | 0.452 |
| American Samoa                         | 0.678 | 0.682 | 0.686 | 0.69  | 0.694 | 0.698 | 0.702 | 0.706 | 0.709 | 0.712 |
| Cook Islands                           | 0.722 | 0.726 | 0.73  | 0.734 | 0.739 | 0.744 | 0.75  | 0.755 | 0.76  | 0.764 |
| Fiji                                   | 0.622 | 0.626 | 0.63  | 0.635 | 0.639 | 0.644 | 0.649 | 0.654 | 0.659 | 0.664 |
| Guam                                   | 0.785 | 0.789 | 0.792 | 0.795 | 0.797 | 0.799 | 0.803 | 0.807 | 0.81  | 0.813 |

|                                |       |       |       |       |       |       |       |       |       |       |
|--------------------------------|-------|-------|-------|-------|-------|-------|-------|-------|-------|-------|
| Kiribati                       | 0.492 | 0.495 | 0.497 | 0.501 | 0.504 | 0.509 | 0.514 | 0.518 | 0.523 | 0.527 |
| Marshall Islands               | 0.498 | 0.504 | 0.509 | 0.515 | 0.52  | 0.525 | 0.531 | 0.536 | 0.541 | 0.544 |
| Federated States of Micronesia | 0.546 | 0.55  | 0.554 | 0.558 | 0.561 | 0.565 | 0.569 | 0.573 | 0.577 | 0.58  |
| Nauru                          | 0.529 | 0.538 | 0.547 | 0.559 | 0.573 | 0.585 | 0.595 | 0.605 | 0.613 | 0.618 |
| Niue                           | 0.669 | 0.675 | 0.681 | 0.685 | 0.69  | 0.695 | 0.699 | 0.703 | 0.707 | 0.711 |
| Northern Mariana Islands       | 0.751 | 0.75  | 0.75  | 0.75  | 0.75  | 0.751 | 0.756 | 0.761 | 0.767 | 0.771 |
| Palau                          | 0.707 | 0.71  | 0.714 | 0.717 | 0.72  | 0.725 | 0.729 | 0.732 | 0.735 | 0.738 |
| Papua New Guinea               | 0.356 | 0.36  | 0.363 | 0.367 | 0.372 | 0.377 | 0.382 | 0.386 | 0.391 | 0.394 |
| Samoa                          | 0.612 | 0.615 | 0.618 | 0.62  | 0.623 | 0.626 | 0.629 | 0.633 | 0.637 | 0.641 |
| Solomon Islands                | 0.358 | 0.364 | 0.371 | 0.377 | 0.382 | 0.387 | 0.393 | 0.398 | 0.403 | 0.407 |
| Tokelau                        | 0.565 | 0.573 | 0.58  | 0.588 | 0.595 | 0.602 | 0.608 | 0.615 | 0.621 | 0.626 |
| Tonga                          | 0.598 | 0.602 | 0.606 | 0.61  | 0.614 | 0.618 | 0.622 | 0.627 | 0.632 | 0.636 |
| Tuvalu                         | 0.545 | 0.549 | 0.553 | 0.558 | 0.562 | 0.567 | 0.573 | 0.579 | 0.584 | 0.589 |
| Vanuatu                        | 0.446 | 0.451 | 0.455 | 0.46  | 0.464 | 0.468 | 0.473 | 0.477 | 0.481 | 0.485 |
| Southeast Asia                 | 0.585 | 0.592 | 0.599 | 0.606 | 0.612 | 0.619 | 0.626 | 0.632 | 0.639 | 0.644 |
| Cambodia                       | 0.406 | 0.413 | 0.421 | 0.428 | 0.435 | 0.442 | 0.449 | 0.456 | 0.463 | 0.469 |
| Indonesia                      | 0.593 | 0.601 | 0.609 | 0.617 | 0.625 | 0.633 | 0.64  | 0.647 | 0.654 | 0.66  |
| Aceh                           | 0.608 | 0.614 | 0.62  | 0.626 | 0.633 | 0.64  | 0.646 | 0.653 | 0.66  | 0.666 |
| Bali                           | 0.582 | 0.59  | 0.598 | 0.606 | 0.613 | 0.621 | 0.628 | 0.635 | 0.642 | 0.648 |
| Bangka-Belitung Islands        | 0.581 | 0.589 | 0.597 | 0.604 | 0.612 | 0.619 | 0.627 | 0.634 | 0.641 | 0.647 |
| Banten                         | 0.575 | 0.583 | 0.591 | 0.599 | 0.606 | 0.614 | 0.621 | 0.629 | 0.636 | 0.642 |
| Bengkulu                       | 0.55  | 0.558 | 0.567 | 0.575 | 0.583 | 0.591 | 0.598 | 0.606 | 0.613 | 0.619 |
| Corontalo                      | 0.496 | 0.505 | 0.514 | 0.523 | 0.532 | 0.54  | 0.548 | 0.555 | 0.563 | 0.569 |
| Jakarta                        | 0.74  | 0.748 | 0.756 | 0.764 | 0.771 | 0.778 | 0.785 | 0.791 | 0.797 | 0.802 |
| Jambi                          | 0.571 | 0.581 | 0.59  | 0.598 | 0.606 | 0.614 | 0.621 | 0.628 | 0.635 | 0.641 |
| West Java                      | 0.582 | 0.59  | 0.598 | 0.606 | 0.614 | 0.621 | 0.629 | 0.636 | 0.643 | 0.648 |
| Central Java                   | 0.547 | 0.555 | 0.563 | 0.571 | 0.579 | 0.586 | 0.593 | 0.6   | 0.607 | 0.613 |
| East Java                      | 0.58  | 0.589 | 0.597 | 0.604 | 0.612 | 0.619 | 0.626 | 0.633 | 0.64  | 0.646 |
| West Kalimantan                | 0.532 | 0.54  | 0.548 | 0.555 | 0.563 | 0.57  | 0.578 | 0.585 | 0.592 | 0.598 |
| South Kalimantan               | 0.571 | 0.579 | 0.586 | 0.594 | 0.601 | 0.609 | 0.616 | 0.623 | 0.63  | 0.636 |
| Central Kalimantan             | 0.589 | 0.596 | 0.604 | 0.611 | 0.619 | 0.626 | 0.633 | 0.64  | 0.647 | 0.653 |
| East Kalimantan                | 0.695 | 0.703 | 0.711 | 0.719 | 0.727 | 0.734 | 0.742 | 0.749 | 0.756 | 0.762 |
| North Kalimantan               | 0.689 | 0.698 | 0.707 | 0.715 | 0.723 | 0.731 | 0.738 | 0.745 | 0.752 | 0.758 |
| Riau Islands                   | 0.68  | 0.687 | 0.695 | 0.702 | 0.709 | 0.717 | 0.724 | 0.731 | 0.737 | 0.742 |
| Lampung                        | 0.546 | 0.556 | 0.565 | 0.574 | 0.582 | 0.59  | 0.598 | 0.605 | 0.612 | 0.617 |
| Maluku                         | 0.503 | 0.511 | 0.519 | 0.527 | 0.535 | 0.544 | 0.552 | 0.56  | 0.568 | 0.575 |
| North Maluku                   | 0.487 | 0.495 | 0.504 | 0.513 | 0.522 | 0.531 | 0.539 | 0.547 | 0.555 | 0.562 |
| West Nusa Tenggara             | 0.513 | 0.522 | 0.53  | 0.538 | 0.546 | 0.554 | 0.561 | 0.568 | 0.575 | 0.582 |
| East Nusa Tenggara             | 0.472 | 0.48  | 0.488 | 0.497 | 0.505 | 0.513 | 0.521 | 0.529 | 0.537 | 0.543 |
| Papua                          | 0.559 | 0.567 | 0.575 | 0.583 | 0.591 | 0.599 | 0.607 | 0.615 | 0.623 | 0.629 |
| West Papua                     | 0.58  | 0.593 | 0.604 | 0.615 | 0.625 | 0.634 | 0.643 | 0.652 | 0.66  | 0.666 |
| Riau                           | 0.663 | 0.67  | 0.678 | 0.685 | 0.693 | 0.7   | 0.707 | 0.714 | 0.721 | 0.727 |
| West Sulawesi                  | 0.495 | 0.505 | 0.515 | 0.524 | 0.533 | 0.542 | 0.55  | 0.558 | 0.566 | 0.573 |
| South Sulawesi                 | 0.554 | 0.564 | 0.573 | 0.581 | 0.59  | 0.598 | 0.605 | 0.613 | 0.62  | 0.626 |
| Central Sulawesi               | 0.557 | 0.566 | 0.575 | 0.583 | 0.592 | 0.6   | 0.608 | 0.615 | 0.622 | 0.628 |
| Southeast Sulawesi             | 0.536 | 0.546 | 0.556 | 0.565 | 0.574 | 0.582 | 0.59  | 0.598 | 0.606 | 0.612 |

|                            |       |       |       |       |       |       |       |       |       |       |
|----------------------------|-------|-------|-------|-------|-------|-------|-------|-------|-------|-------|
| North Sulawesi             | 0.6   | 0.608 | 0.615 | 0.623 | 0.631 | 0.638 | 0.645 | 0.652 | 0.658 | 0.664 |
| West Sumatra               | 0.6   | 0.609 | 0.617 | 0.625 | 0.633 | 0.641 | 0.648 | 0.655 | 0.662 | 0.668 |
| South Sumatra              | 0.59  | 0.598 | 0.607 | 0.615 | 0.622 | 0.63  | 0.637 | 0.644 | 0.651 | 0.657 |
| North Sumatra              | 0.605 | 0.614 | 0.623 | 0.631 | 0.639 | 0.647 | 0.654 | 0.662 | 0.669 | 0.675 |
| Yogyakarta                 | 0.608 | 0.616 | 0.624 | 0.631 | 0.639 | 0.646 | 0.652 | 0.659 | 0.665 | 0.671 |
| Laos                       | 0.413 | 0.422 | 0.431 | 0.441 | 0.45  | 0.458 | 0.467 | 0.475 | 0.483 | 0.49  |
| Malaysia                   | 0.693 | 0.698 | 0.704 | 0.71  | 0.716 | 0.722 | 0.726 | 0.728 | 0.732 | 0.737 |
| Maldives                   | 0.504 | 0.511 | 0.518 | 0.525 | 0.532 | 0.538 | 0.544 | 0.551 | 0.557 | 0.562 |
| Mauritius                  | 0.652 | 0.658 | 0.665 | 0.673 | 0.68  | 0.686 | 0.69  | 0.695 | 0.7   | 0.705 |
| Myanmar                    | 0.446 | 0.455 | 0.464 | 0.473 | 0.482 | 0.49  | 0.498 | 0.506 | 0.514 | 0.521 |
| Philippines                | 0.567 | 0.572 | 0.577 | 0.583 | 0.589 | 0.596 | 0.603 | 0.61  | 0.617 | 0.623 |
| Seychelles                 | 0.679 | 0.683 | 0.687 | 0.691 | 0.696 | 0.702 | 0.707 | 0.713 | 0.719 | 0.724 |
| Sri Lanka                  | 0.628 | 0.636 | 0.644 | 0.651 | 0.658 | 0.666 | 0.672 | 0.678 | 0.684 | 0.69  |
| Thailand                   | 0.638 | 0.643 | 0.649 | 0.655 | 0.66  | 0.666 | 0.671 | 0.676 | 0.682 | 0.687 |
| Timor-Leste                | 0.458 | 0.469 | 0.48  | 0.488 | 0.493 | 0.498 | 0.503 | 0.508 | 0.511 | 0.514 |
| Vietnam                    | 0.549 | 0.558 | 0.566 | 0.573 | 0.581 | 0.589 | 0.596 | 0.604 | 0.611 | 0.617 |
| Sub-Saharan Africa         | 0.394 | 0.401 | 0.409 | 0.416 | 0.423 | 0.431 | 0.438 | 0.445 | 0.452 | 0.456 |
| Central sub-Saharan Africa | 0.378 | 0.389 | 0.4   | 0.412 | 0.423 | 0.434 | 0.445 | 0.454 | 0.463 | 0.47  |
| Angola                     | 0.376 | 0.387 | 0.398 | 0.41  | 0.421 | 0.432 | 0.443 | 0.454 | 0.463 | 0.47  |
| Central African Republic   | 0.253 | 0.258 | 0.263 | 0.263 | 0.263 | 0.264 | 0.266 | 0.268 | 0.271 | 0.274 |
| Congo (Brazzaville)        | 0.491 | 0.5   | 0.509 | 0.519 | 0.528 | 0.538 | 0.547 | 0.556 | 0.563 | 0.568 |
| DR Congo                   | 0.266 | 0.277 | 0.289 | 0.305 | 0.321 | 0.336 | 0.35  | 0.362 | 0.374 | 0.382 |
| Equatorial Guinea          | 0.578 | 0.594 | 0.611 | 0.626 | 0.64  | 0.652 | 0.663 | 0.673 | 0.681 | 0.685 |
| Gabon                      | 0.579 | 0.587 | 0.596 | 0.605 | 0.614 | 0.623 | 0.632 | 0.641 | 0.649 | 0.656 |
| Eastern sub-Saharan Africa | 0.336 | 0.343 | 0.351 | 0.359 | 0.367 | 0.375 | 0.383 | 0.391 | 0.399 | 0.405 |
| Burundi                    | 0.243 | 0.248 | 0.254 | 0.26  | 0.266 | 0.27  | 0.274 | 0.278 | 0.282 | 0.284 |
| Comoros                    | 0.401 | 0.407 | 0.413 | 0.419 | 0.426 | 0.432 | 0.438 | 0.444 | 0.45  | 0.455 |
| Djibouti                   | 0.384 | 0.392 | 0.4   | 0.408 | 0.416 | 0.425 | 0.434 | 0.443 | 0.452 | 0.459 |
| Eritrea                    | 0.334 | 0.34  | 0.346 | 0.353 | 0.36  | 0.367 | 0.375 | 0.382 | 0.39  | 0.396 |
| Ethiopia                   | 0.244 | 0.256 | 0.268 | 0.279 | 0.291 | 0.302 | 0.313 | 0.324 | 0.334 | 0.343 |
| Kenya                      | 0.441 | 0.448 | 0.455 | 0.463 | 0.47  | 0.478 | 0.486 | 0.494 | 0.502 | 0.508 |
| Baringo                    | 0.392 | 0.4   | 0.408 | 0.417 | 0.426 | 0.436 | 0.447 | 0.457 | 0.468 | 0.476 |
| Bomet                      | 0.433 | 0.443 | 0.454 | 0.465 | 0.476 | 0.487 | 0.499 | 0.511 | 0.522 | 0.531 |
| Bungoma                    | 0.395 | 0.404 | 0.413 | 0.423 | 0.433 | 0.444 | 0.454 | 0.465 | 0.475 | 0.483 |
| Busia                      | 0.37  | 0.378 | 0.387 | 0.396 | 0.405 | 0.415 | 0.425 | 0.435 | 0.445 | 0.453 |
| Elgeyo Marakwet            | 0.406 | 0.416 | 0.426 | 0.437 | 0.449 | 0.46  | 0.471 | 0.483 | 0.494 | 0.503 |
| Embu                       | 0.478 | 0.485 | 0.492 | 0.5   | 0.508 | 0.516 | 0.525 | 0.534 | 0.542 | 0.55  |
| Garissa                    | 0.259 | 0.264 | 0.27  | 0.275 | 0.281 | 0.287 | 0.293 | 0.299 | 0.305 | 0.31  |
| Homa Bay                   | 0.348 | 0.358 | 0.369 | 0.381 | 0.393 | 0.405 | 0.418 | 0.431 | 0.443 | 0.452 |
| Isiolo                     | 0.339 | 0.346 | 0.353 | 0.361 | 0.369 | 0.378 | 0.387 | 0.396 | 0.405 | 0.413 |
| Kajiado                    | 0.48  | 0.489 | 0.498 | 0.507 | 0.516 | 0.526 | 0.536 | 0.545 | 0.555 | 0.563 |
| Kakamega                   | 0.401 | 0.41  | 0.419 | 0.429 | 0.439 | 0.449 | 0.46  | 0.47  | 0.481 | 0.489 |
| Kericho                    | 0.408 | 0.419 | 0.43  | 0.441 | 0.453 | 0.465 | 0.477 | 0.489 | 0.501 | 0.509 |
| Kiambu                     | 0.538 | 0.546 | 0.554 | 0.562 | 0.57  | 0.578 | 0.586 | 0.594 | 0.602 | 0.609 |
| Kilifi                     | 0.407 | 0.415 | 0.424 | 0.433 | 0.443 | 0.453 | 0.463 | 0.474 | 0.484 | 0.492 |
| Kirinyaga                  | 0.477 | 0.484 | 0.491 | 0.499 | 0.506 | 0.514 | 0.523 | 0.531 | 0.539 | 0.546 |

|                             |        |        |        |        |        |        |       |        |        |       |
|-----------------------------|--------|--------|--------|--------|--------|--------|-------|--------|--------|-------|
| Kisii                       | 0.468  | 0.477  | 0.487  | 0.497  | 0.507  | 0.518  | 0.528 | 0.539  | 0.549  | 0.557 |
| Kisumu                      | 0.465  | 0.475  | 0.485  | 0.496  | 0.507  | 0.518  | 0.529 | 0.54   | 0.551  | 0.559 |
| Kitui                       | 0.388  | 0.396  | 0.406  | 0.415  | 0.425  | 0.435  | 0.446 | 0.456  | 0.466  | 0.474 |
| Kwale                       | 0.39   | 0.397  | 0.405  | 0.414  | 0.423  | 0.432  | 0.442 | 0.452  | 0.461  | 0.469 |
| Laikipia                    | 0.479  | 0.489  | 0.498  | 0.508  | 0.518  | 0.528  | 0.538 | 0.549  | 0.559  | 0.567 |
| Lamu                        | 0.414  | 0.421  | 0.429  | 0.436  | 0.444  | 0.453  | 0.462 | 0.471  | 0.48   | 0.488 |
| Machakos                    | 0.472  | 0.48   | 0.489  | 0.498  | 0.508  | 0.517  | 0.527 | 0.536  | 0.546  | 0.553 |
| Makueni                     | 0.381  | 0.389  | 0.398  | 0.406  | 0.416  | 0.425  | 0.435 | 0.445  | 0.455  | 0.462 |
| Mandera                     | 0.245  | 0.251  | 0.257  | 0.264  | 0.27   | 0.277  | 0.283 | 0.29   | 0.296  | 0.302 |
| Marsabit                    | 0.313  | 0.32   | 0.328  | 0.337  | 0.346  | 0.354  | 0.363 | 0.372  | 0.381  | 0.388 |
| Meru                        | 0.448  | 0.456  | 0.464  | 0.472  | 0.481  | 0.49   | 0.5   | 0.509  | 0.518  | 0.525 |
| Migori                      | 0.345  | 0.354  | 0.364  | 0.375  | 0.386  | 0.397  | 0.409 | 0.421  | 0.433  | 0.442 |
| Mombasa                     | 0.507  | 0.514  | 0.522  | 0.53   | 0.539  | 0.548  | 0.557 | 0.566  | 0.575  | 0.582 |
| Murang'a                    | 0.478  | 0.486  | 0.493  | 0.501  | 0.509  | 0.518  | 0.526 | 0.535  | 0.543  | 0.55  |
| Nairobi                     | 0.604  | 0.61   | 0.617  | 0.624  | 0.63   | 0.637  | 0.645 | 0.652  | 0.66   | 0.665 |
| Nakuru                      | 0.461  | 0.47   | 0.479  | 0.489  | 0.499  | 0.509  | 0.52  | 0.53   | 0.54   | 0.548 |
| Nandi                       | 0.453  | 0.462  | 0.471  | 0.481  | 0.491  | 0.502  | 0.513 | 0.524  | 0.534  | 0.543 |
| Narok                       | 0.33   | 0.338  | 0.347  | 0.356  | 0.366  | 0.376  | 0.387 | 0.398  | 0.409  | 0.418 |
| Nyamira                     | 0.487  | 0.496  | 0.506  | 0.517  | 0.527  | 0.538  | 0.55  | 0.561  | 0.571  | 0.579 |
| Nyandarua                   | 0.467  | 0.475  | 0.483  | 0.492  | 0.501  | 0.51   | 0.519 | 0.529  | 0.538  | 0.546 |
| Nyeri                       | 0.496  | 0.504  | 0.512  | 0.52   | 0.528  | 0.536  | 0.545 | 0.553  | 0.561  | 0.568 |
| Samburu                     | 0.281  | 0.289  | 0.297  | 0.306  | 0.314  | 0.324  | 0.333 | 0.343  | 0.353  | 0.361 |
| Siaya                       | 0.347  | 0.358  | 0.368  | 0.38   | 0.392  | 0.404  | 0.416 | 0.428  | 0.44   | 0.449 |
| Taita Taveta                | 0.462  | 0.47   | 0.478  | 0.486  | 0.495  | 0.504  | 0.513 | 0.522  | 0.531  | 0.539 |
| Tana River                  | 0.317  | 0.324  | 0.331  | 0.34   | 0.348  | 0.357  | 0.366 | 0.375  | 0.384  | 0.391 |
| Tharaka Nithi               | 0.479  | 0.488  | 0.497  | 0.506  | 0.516  | 0.526  | 0.536 | 0.546  | 0.556  | 0.564 |
| Trans Nzoia                 | 0.451  | 0.459  | 0.468  | 0.478  | 0.488  | 0.498  | 0.509 | 0.52   | 0.53   | 0.539 |
| Turkana                     | 0.286  | 0.292  | 0.299  | 0.306  | 0.314  | 0.322  | 0.33  | 0.339  | 0.347  | 0.355 |
| Uasin Gishu                 | 0.496  | 0.505  | 0.514  | 0.524  | 0.535  | 0.545  | 0.556 | 0.566  | 0.577  | 0.585 |
| Vihiga                      | 0.391  | 0.398  | 0.405  | 0.413  | 0.421  | 0.429  | 0.438 | 0.447  | 0.457  | 0.464 |
| Wajir                       | 0.21   | 0.215  | 0.22   | 0.225  | 0.231  | 0.236  | 0.242 | 0.248  | 0.253  | 0.259 |
| West Pokot                  | 0.326  | 0.336  | 0.346  | 0.357  | 0.368  | 0.379  | 0.39  | 0.402  | 0.413  | 0.422 |
| Madagascar                  | 0.336  | 0.342  | 0.348  | 0.355  | 0.361  | 0.369  | 0.376 | 0.383  | 0.391  | 0.396 |
| Malawi                      | 0.317  | 0.326  | 0.335  | 0.342  | 0.35   | 0.358  | 0.365 | 0.372  | 0.379  | 0.384 |
| Mozambique                  | 0.237  | 0.244  | 0.252  | 0.26   | 0.268  | 0.277  | 0.285 | 0.294  | 0.301  | 0.307 |
| Rwanda                      | 0.359  | 0.368  | 0.376  | 0.384  | 0.391  | 0.399  | 0.407 | 0.415  | 0.422  | 0.429 |
| Somalia                     | 0.0692 | 0.0703 | 0.0716 | 0.0728 | 0.0742 | 0.0756 | 0.077 | 0.0785 | 0.0799 | 0.081 |
| South Sudan                 | 0.32   | 0.325  | 0.33   | 0.334  | 0.339  | 0.342  | 0.345 | 0.351  | 0.358  | 0.363 |
| Uganda                      | 0.325  | 0.335  | 0.345  | 0.355  | 0.364  | 0.373  | 0.382 | 0.391  | 0.399  | 0.404 |
| Tanzania                    | 0.354  | 0.361  | 0.368  | 0.375  | 0.383  | 0.391  | 0.399 | 0.408  | 0.416  | 0.423 |
| Zambia                      | 0.418  | 0.429  | 0.44   | 0.451  | 0.462  | 0.472  | 0.481 | 0.491  | 0.499  | 0.505 |
| Southern sub-Saharan Africa | 0.605  | 0.61   | 0.614  | 0.619  | 0.623  | 0.628  | 0.632 | 0.636  | 0.639  | 0.642 |
| Botswana                    | 0.581  | 0.587  | 0.593  | 0.6    | 0.606  | 0.612  | 0.618 | 0.624  | 0.63   | 0.634 |
| eSwatini                    | 0.526  | 0.532  | 0.538  | 0.545  | 0.551  | 0.557  | 0.563 | 0.569  | 0.574  | 0.577 |
| Lesotho                     | 0.448  | 0.455  | 0.462  | 0.469  | 0.476  | 0.483  | 0.489 | 0.496  | 0.502  | 0.507 |
| Namibia                     | 0.558  | 0.564  | 0.571  | 0.577  | 0.584  | 0.591  | 0.597 | 0.603  | 0.608  | 0.612 |
| South Africa                | 0.642  | 0.647  | 0.651  | 0.656  | 0.66   | 0.664  | 0.668 | 0.672  | 0.676  | 0.678 |

|                            |       |       |       |       |       |       |       |       |       |       |
|----------------------------|-------|-------|-------|-------|-------|-------|-------|-------|-------|-------|
| Zimbabwe                   | 0.425 | 0.427 | 0.432 | 0.438 | 0.445 | 0.452 | 0.459 | 0.465 | 0.471 | 0.476 |
| Western sub-Saharan Africa | 0.383 | 0.391 | 0.399 | 0.407 | 0.415 | 0.422 | 0.43  | 0.437 | 0.443 | 0.448 |
| Benin                      | 0.297 | 0.301 | 0.306 | 0.312 | 0.318 | 0.324 | 0.331 | 0.338 | 0.346 | 0.352 |
| Burkina Faso               | 0.21  | 0.215 | 0.22  | 0.226 | 0.231 | 0.236 | 0.241 | 0.247 | 0.252 | 0.257 |
| Cape Verde                 | 0.461 | 0.469 | 0.477 | 0.484 | 0.491 | 0.498 | 0.505 | 0.512 | 0.519 | 0.525 |
| Cameroon                   | 0.412 | 0.42  | 0.428 | 0.436 | 0.445 | 0.455 | 0.464 | 0.474 | 0.483 | 0.49  |
| Chad                       | 0.185 | 0.191 | 0.197 | 0.203 | 0.21  | 0.216 | 0.223 | 0.228 | 0.234 | 0.238 |
| Côte d'Ivoire              | 0.346 | 0.35  | 0.355 | 0.362 | 0.369 | 0.376 | 0.384 | 0.393 | 0.401 | 0.408 |
| The Gambia                 | 0.334 | 0.341 | 0.348 | 0.356 | 0.363 | 0.37  | 0.378 | 0.385 | 0.393 | 0.399 |
| Ghana                      | 0.474 | 0.484 | 0.494 | 0.504 | 0.514 | 0.523 | 0.531 | 0.541 | 0.549 | 0.557 |
| Guinea                     | 0.267 | 0.272 | 0.278 | 0.284 | 0.29  | 0.296 | 0.303 | 0.31  | 0.318 | 0.325 |
| Guinea-Bissau              | 0.297 | 0.304 | 0.31  | 0.316 | 0.322 | 0.328 | 0.335 | 0.342 | 0.349 | 0.355 |
| Liberia                    | 0.296 | 0.305 | 0.314 | 0.325 | 0.335 | 0.344 | 0.351 | 0.358 | 0.365 | 0.37  |
| Mali                       | 0.214 | 0.22  | 0.225 | 0.23  | 0.235 | 0.241 | 0.247 | 0.253 | 0.259 | 0.263 |
| Mauritania                 | 0.427 | 0.435 | 0.443 | 0.45  | 0.459 | 0.467 | 0.474 | 0.482 | 0.49  | 0.496 |
| Niger                      | 0.119 | 0.123 | 0.128 | 0.133 | 0.138 | 0.143 | 0.148 | 0.153 | 0.158 | 0.162 |
| Nigeria                    | 0.442 | 0.451 | 0.46  | 0.469 | 0.478 | 0.487 | 0.495 | 0.503 | 0.51  | 0.515 |
| São Tomé and Príncipe      | 0.424 | 0.433 | 0.443 | 0.452 | 0.461 | 0.47  | 0.478 | 0.487 | 0.495 | 0.502 |
| Senegal                    | 0.33  | 0.336 | 0.342 | 0.348 | 0.354 | 0.361 | 0.368 | 0.375 | 0.382 | 0.389 |
| Sierra Leone               | 0.275 | 0.283 | 0.292 | 0.304 | 0.314 | 0.321 | 0.328 | 0.335 | 0.342 | 0.347 |
| Togo                       | 0.352 | 0.358 | 0.364 | 0.371 | 0.379 | 0.386 | 0.394 | 0.402 | 0.411 | 0.417 |

Data obtained from Global Burden of Disease Collaborative Network. Global Burden of Disease Study 2019 (GBD 2019) Socio-Demographic Index (SDI) 1950–2019. Seattle, United States of America: Institute for Health Metrics and Evaluation (IHME), 2020.

**Supplementary Material Table S2** Data quality rating for cause of death data 2010-2019, by country.

| Country                  | Data Quality Rating |
|--------------------------|---------------------|
| Afghanistan              | 1                   |
| Albania                  | 3                   |
| Algeria                  | 1                   |
| American Samoa           | 3                   |
| Andorra                  | 1                   |
| Angola                   | 1                   |
| Antigua and Barbuda      | 4                   |
| Argentina                | 4                   |
| Armenia                  | 5                   |
| Australia                | 5                   |
| Austria                  | 5                   |
| Azerbaijan               | 3                   |
| Bahrain                  | 3                   |
| Bangladesh               | 2                   |
| Barbados                 | 4                   |
| Belarus                  | 4                   |
| Belgium                  | 4                   |
| Belize                   | 4                   |
| Benin                    | 1                   |
| Bermuda                  | 5                   |
| Bhutan                   | 0                   |
| Venezuela                | 5                   |
| Bosnia and Herzegovina   | 2                   |
| Botswana                 | 0                   |
| Brazil                   | 4                   |
| Brunei                   | 3                   |
| Bulgaria                 | 4                   |
| Burkina Faso             | 1                   |
| Burundi                  | 1                   |
| Cambodia                 | 1                   |
| Cameroon                 | 0                   |
| Canada                   | 5                   |
| Central African Republic | 0                   |
| Chad                     | 0                   |
| Chile                    | 4                   |
| China                    | 3                   |
| Colombia                 | 4                   |
| The Bahamas              | 4                   |
| Comoros                  | 0                   |
| Congo (Brazzaville)      | 0                   |
| Cook Islands             | 2                   |
| Costa Rica               | 5                   |



|                                |   |
|--------------------------------|---|
| Croatia                        | 4 |
| Cuba                           | 5 |
| Cyprus                         | 2 |
| Czech Republic                 | 4 |
| North Korea                    | 0 |
| DR Congo                       | 1 |
| Denmark                        | 5 |
| Djibouti                       | 0 |
| Dominica                       | 3 |
| Dominican Republic             | 3 |
| Ecuador                        | 3 |
| Egypt                          | 2 |
| El Salvador                    | 3 |
| Equatorial Guinea              | 0 |
| Eritrea                        | 0 |
| Estonia                        | 5 |
| Ethiopia                       | 1 |
| Federated States of Micronesia | 0 |
| Fiji                           | 2 |
| Finland                        | 5 |
| France                         | 4 |
| Gabon                          | 0 |
| Georgia                        | 4 |
| Germany                        | 4 |
| Ghana                          | 1 |
| Greece                         | 4 |
| Greenland                      | 3 |
| Grenada                        | 4 |
| Guam                           | 3 |
| Guatemala                      | 4 |
| Guinea                         | 1 |
| Guinea-Bissau                  | 1 |
| Guyana                         | 4 |
| Haiti                          | 1 |
| Honduras                       | 2 |
| Hungary                        | 5 |
| Iceland                        | 5 |
| India                          | 2 |
| Indonesia                      | 2 |
| Iraq                           | 2 |
| Ireland                        | 5 |
| Iran                           | 2 |
| Israel                         | 4 |
| Italy                          | 5 |
| Jamaica                        | 4 |

|                          |   |
|--------------------------|---|
| Japan                    | 5 |
| Jordan                   | 2 |
| Kazakhstan               | 4 |
| Kenya                    | 1 |
| eSwatini                 | 1 |
| Kiribati                 | 2 |
| Kuwait                   | 4 |
| Kyrgyzstan               | 4 |
| Laos                     | 1 |
| Latvia                   | 5 |
| Lebanon                  | 1 |
| Lesotho                  | 0 |
| Liberia                  | 1 |
| Libya                    | 1 |
| Lithuania                | 5 |
| Luxembourg               | 4 |
| Madagascar               | 1 |
| Malawi                   | 1 |
| Malaysia                 | 2 |
| Maldives                 | 2 |
| Mali                     | 1 |
| Malta                    | 5 |
| Marshall Islands         | 0 |
| Mauritania               | 0 |
| Mauritius                | 4 |
| Mexico                   | 4 |
| Mongolia                 | 2 |
| Montenegro               | 2 |
| Morocco                  | 2 |
| Mozambique               | 2 |
| Myanmar                  | 1 |
| Namibia                  | 0 |
| Nepal                    | 1 |
| Netherlands              | 5 |
| New Zealand              | 5 |
| Nicaragua                | 3 |
| Niger                    | 1 |
| Nigeria                  | 1 |
| Northern Mariana Islands | 2 |
| Norway                   | 5 |
| Oman                     | 2 |
| Pakistan                 | 2 |
| Palestine                | 2 |
| Panama                   | 4 |
| Papua New Guinea         | 1 |

|                                  |   |
|----------------------------------|---|
| Paraguay                         | 3 |
| Peru                             | 3 |
| Philippines                      | 3 |
| Bolivia                          | 1 |
| Poland                           | 4 |
| Portugal                         | 4 |
| Monaco                           | 2 |
| Puerto Rico                      | 4 |
| Qatar                            | 2 |
| Cape Verde                       | 2 |
| Côte d'Ivoire                    | 1 |
| South Korea                      | 3 |
| Moldova                          | 5 |
| Nauru                            | 0 |
| Niue                             | 0 |
| Palau                            | 1 |
| San Marino                       | 3 |
| The Gambia                       | 1 |
| Romania                          | 4 |
| Russia                           | 5 |
| Rwanda                           | 1 |
| Saint Kitts and Nevis            | 4 |
| Saint Lucia                      | 4 |
| Saint Vincent and the Grenadines | 4 |
| Samoa                            | 0 |
| São Tomé and Príncipe            | 1 |
| Saudi Arabia                     | 2 |
| Senegal                          | 1 |
| Serbia                           | 3 |
| Seychelles                       | 3 |
| Sierra Leone                     | 1 |
| Singapore                        | 5 |
| Slovakia                         | 3 |
| Slovenia                         | 4 |
| Vietnam                          | 2 |
| Solomon Islands                  | 1 |
| Somalia                          | 0 |
| South Africa                     | 3 |
| South Sudan                      | 0 |
| Spain                            | 4 |
| Sri Lanka                        | 3 |
| Sudan                            | 0 |
| Suriname                         | 3 |
| Sweden                           | 5 |

|                            |   |
|----------------------------|---|
| Switzerland                | 4 |
| Syria                      | 3 |
| Taiwan (province of China) | 4 |
| Tajikistan                 | 3 |
| Thailand                   | 3 |
| North Macedonia            | 3 |
| Timor-Leste                | 0 |
| Togo                       | 0 |
| Tokelau                    | 0 |
| Tonga                      | 1 |
| Trinidad and Tobago        | 5 |
| Tunisia                    | 1 |
| Turkey                     | 3 |
| Turkmenistan               | 4 |
| Tuvalu                     | 0 |
| Uganda                     | 1 |
| Ukraine                    | 5 |
| United Arab Emirates       | 1 |
| UK                         | 5 |
| Northern Ireland           | 5 |
| Scotland                   | 5 |
| Wales                      | 5 |
| England                    | 5 |
| Tanzania                   | 1 |
| Virgin Islands             | 3 |
| USA                        | 5 |
| Uruguay                    | 4 |
| Uzbekistan                 | 4 |
| Vanuatu                    | 0 |
| Yemen                      | 0 |
| Zambia                     | 1 |
| Zimbabwe                   | 2 |

Data obtained from Global Burden of Disease Collaborative Network. Global Burden of Disease Study 2019 (GBD 2019). Seattle, United States of America: Institute for Health Metrics and Evaluation (IHME), 2020.

**Supplementary Material Table S3.** Age-specific incidence rates (ASIRs) of inflammatory bowel disease in patient aged 65-89 years in 2010 and 2019, stratified by countries.

| Countries                        | 2010 ASIR, per 100,000 (95% UI) | 2019 ASIR, per 100,000 (95% UI) | APC (95% CI)           | <i>p</i> |
|----------------------------------|---------------------------------|---------------------------------|------------------------|----------|
| Afghanistan                      | 2.67 (1.87 to 3.8)              | 2.87 (2.05 to 4.07)             | 0.78 (0.65 to 0.9)     | <0.001   |
| Albania                          | 10.68 (8.07 to 14.32)           | 10.54 (7.86 to 13.74)           | -0.15 (-0.19 to -0.12) | <0.001   |
| Algeria                          | 5.15 (3.66 to 7.41)             | 5.44 (3.78 to 7.47)             | 0.59 (0.52 to 0.65)    | <0.001   |
| American Samoa                   | 0.91 (0.68 to 1.23)             | 0.99 (0.74 to 1.32)             | 0.79 (0.34 to 1.24)    | 0.001    |
| Andorra                          | 10.06 (7.75 to 13.04)           | 9.9 (7.68 to 12.79)             | -0.15 (-0.28 to -0.03) | 0.017    |
| Angola                           | 2.27 (1.69 to 3)                | 2.42 (1.81 to 3.19)             | 0.71 (0.64 to 0.77)    | <0.001   |
| Antigua and Barbuda              | 3.09 (2.23 to 4.25)             | 3.69 (2.65 to 5.11)             | 2.03 (1.94 to 2.12)    | <0.001   |
| Argentina                        | 1.61 (1.23 to 2.09)             | 1.67 (1.25 to 2.19)             | 0.36 (0.18 to 0.55)    | <0.001   |
| Armenia                          | 10.02 (7.57 to 13.46)           | 10.46 (7.86 to 14.03)           | 0.44 (0.34 to 0.54)    | <0.001   |
| Australia                        | 18.36 (15.28 to 21.62)          | 20.02 (16.68 to 23.72)          | 1.02 (0.84 to 1.2)     | <0.001   |
| Austria                          | 12.77 (9.83 to 17.05)           | 12.09 (9.56 to 15.53)           | -0.56 (-0.66 to -0.45) | <0.001   |
| Azerbaijan                       | 10.84 (8.17 to 14.4)            | 11.03 (8.22 to 14.63)           | 0.19 (-0.01 to 0.38)   | 0.061    |
| Bahamas                          | 3.76 (2.78 to 5.29)             | 4.71 (3.36 to 6.5)              | 2.68 (2.56 to 2.8)     | <0.001   |
| Bahrain                          | 4.28 (3.06 to 6)                | 4.52 (3.18 to 6.36)             | 0.58 (0.51 to 0.66)    | <0.001   |
| Bangladesh                       | 2.95 (2.12 to 4.01)             | 3 (2.2 to 4.12)                 | 0.15 (0.03 to 0.27)    | 0.017    |
| Barbados                         | 4.27 (3 to 6.11)                | 5.16 (3.6 to 7.13)              | 2.11 (1.96 to 2.25)    | <0.001   |
| Belarus                          | 6.45 (4.73 to 8.9)              | 7.32 (5.39 to 9.77)             | 1.53 (1.26 to 1.8)     | <0.001   |
| Belgium                          | 7.82 (6.66 to 9.19)             | 10.7 (8.28 to 13.83)            | 3.71 (3.15 to 4.28)    | <0.001   |
| Belize                           | 3.28 (2.44 to 4.54)             | 3.88 (2.83 to 5.37)             | 1.97 (1.87 to 2.08)    | <0.001   |
| Benin                            | 1.93 (1.42 to 2.6)              | 2.15 (1.59 to 2.83)             | 1.2 (0.97 to 1.42)     | <0.001   |
| Bermuda                          | 3.86 (2.77 to 5.29)             | 4.46 (3.26 to 6.07)             | 1.57 (1.32 to 1.81)    | <0.001   |
| Bhutan                           | 2.15 (1.59 to 3)                | 2.44 (1.74 to 3.49)             | 1.45 (1.25 to 1.65)    | <0.001   |
| Bolivia (Plurinational State of) | 3.46 (2.59 to 4.49)             | 3.85 (2.91 to 4.98)             | 1.21 (0.99 to 1.44)    | <0.001   |
| Bosnia and Herzegovina           | 11.33 (8.84 to 14.47)           | 11.78 (9.17 to 14.87)           | 0.45 (0.4 to 0.5)      | <0.001   |
| Botswana                         | 2.52 (1.82 to 3.57)             | 2.65 (1.97 to 3.56)             | 0.54 (0.44 to 0.64)    | <0.001   |
| Brazil                           | 10.91 (8.9 to 13.48)            | 10.67 (8.58 to 13.28)           | -0.07 (-0.35 to 0.21)  | 0.592    |
| Brunei Darussalam                | 3.8 (2.66 to 5.24)              | 3.98 (2.83 to 5.56)             | 0.52 (0.46 to 0.58)    | <0.001   |
| Bulgaria                         | 11.38 (8.65 to 14.95)           | 11.53 (8.65 to 15.11)           | 0.17 (0.13 to 0.2)     | <0.001   |
| Burkina Faso                     | 1.76 (1.31 to 2.37)             | 1.9 (1.39 to 2.53)              | 0.87 (0.79 to 0.95)    | <0.001   |
| Burundi                          | 1.69 (1.24 to 2.28)             | 1.69 (1.26 to 2.28)             | 0.02 (0.01 to 0.04)    | 0.015    |
| Côte d'Ivoire                    | 2.05 (1.5 to 2.78)              | 2.3 (1.7 to 3.09)               | 1.38 (1.16 to 1.6)     | <0.001   |
| Cabo Verde                       | 1.92 (1.39 to 2.6)              | 2.19 (1.66 to 2.97)             | 1.51 (1.29 to 1.72)    | <0.001   |
| Cambodia                         | 0.53 (0.38 to 0.7)              | 0.57 (0.42 to 0.76)             | 0.83 (0.57 to 1.08)    | <0.001   |
| Cameroon                         | 2.21 (1.64 to 2.95)             | 2.35 (1.72 to 3.23)             | 0.63 (0.36 to 0.9)     | <0.001   |
| Canada                           | 36.84 (35.2 to 38.54)           | 33.34 (30.99 to 35.94)          | -1.13 (-1.36 to -0.9)  | <0.001   |

|                                       |                        |                        |                        |        |
|---------------------------------------|------------------------|------------------------|------------------------|--------|
| Central African Republic              | 1.94 (1.45 to 2.63)    | 2 (1.5 to 2.69)        | 0.37 (0.32 to 0.41)    | <0.001 |
| Chad                                  | 1.53 (1.12 to 2.14)    | 1.79 (1.31 to 2.5)     | 1.76 (1.42 to 2.1)     | <0.001 |
| Chile                                 | 1.73 (1.29 to 2.29)    | 1.75 (1.31 to 2.34)    | 0.14 (-0.1 to 0.38)    | 0.248  |
| China                                 | 2.36 (1.75 to 3.19)    | 3.02 (2.23 to 4.11)    | 2.72 (2.54 to 2.89)    | <0.001 |
| Colombia                              | 2.83 (2.15 to 3.8)     | 3.24 (2.45 to 4.3)     | 1.53 (1.26 to 1.8)     | <0.001 |
| Comoros                               | 1.85 (1.39 to 2.43)    | 2.01 (1.51 to 2.67)    | 0.99 (0.89 to 1.09)    | <0.001 |
| Congo                                 | 2.36 (1.75 to 3.23)    | 2.54 (1.84 to 3.37)    | 0.88 (0.77 to 0.99)    | <0.001 |
| Cook Islands                          | 1.06 (0.79 to 1.43)    | 1.19 (0.9 to 1.57)     | 1.19 (1.12 to 1.27)    | <0.001 |
| Costa Rica                            | 3.46 (2.61 to 4.61)    | 3.71 (2.83 to 4.84)    | 0.71 (0.58 to 0.85)    | <0.001 |
| Croatia                               | 10.01 (8.42 to 11.75)  | 11.16 (8.97 to 14.17)  | 1.24 (1.2 to 1.28)     | <0.001 |
| Cuba                                  | 3.07 (2.25 to 4.22)    | 3.65 (2.67 to 5.06)    | 2.04 (1.92 to 2.16)    | <0.001 |
| Cyprus                                | 5.28 (4.42 to 6.24)    | 5.34 (4.51 to 6.38)    | 0.12 (0.09 to 0.15)    | <0.001 |
| Czechia                               | 6.55 (5.55 to 7.63)    | 7.94 (6.82 to 9.31)    | 2.48 (2.1 to 2.85)     | <0.001 |
| Democratic People's Republic of Korea | 1.31 (0.94 to 1.83)    | 1.4 (1.02 to 1.88)     | 0.76 (0.73 to 0.8)     | <0.001 |
| Democratic Republic of the Congo      | 1.94 (1.43 to 2.58)    | 2.21 (1.65 to 2.93)    | 1.55 (1.29 to 1.8)     | <0.001 |
| Denmark                               | 20.4 (18.07 to 22.71)  | 19.48 (16.7 to 22.34)  | -0.47 (-0.55 to -0.38) | <0.001 |
| Djibouti                              | 1.81 (1.37 to 2.4)     | 1.75 (1.3 to 2.34)     | -0.33 (-0.44 to -0.22) | <0.001 |
| Dominica                              | 4.08 (3.04 to 5.55)    | 4.46 (3.2 to 6.13)     | 0.98 (0.85 to 1.12)    | <0.001 |
| Dominican Republic                    | 3.2 (2.28 to 4.39)     | 3.79 (2.77 to 5.15)    | 1.95 (1.78 to 2.12)    | <0.001 |
| Ecuador                               | 2.94 (2.27 to 3.78)    | 3.08 (2.39 to 3.91)    | 0.42 (0.28 to 0.56)    | <0.001 |
| Egypt                                 | 5.66 (4.02 to 7.79)    | 6.26 (4.54 to 8.49)    | 1.16 (1.08 to 1.23)    | <0.001 |
| El Salvador                           | 3.65 (2.77 to 4.75)    | 3.68 (2.82 to 4.76)    | 0.14 (0 to 0.28)       | 0.048  |
| Equatorial Guinea                     | 2.6 (1.93 to 3.47)     | 2.95 (2.25 to 3.91)    | 1.39 (1.27 to 1.5)     | <0.001 |
| Eritrea                               | 1.81 (1.36 to 2.45)    | 1.89 (1.42 to 2.53)    | 0.5 (0.43 to 0.58)     | <0.001 |
| Estonia                               | 6.34 (5.11 to 7.88)    | 7.97 (6.36 to 9.86)    | 2.7 (2.4 to 3)         | <0.001 |
| Eswatini                              | 2.56 (1.89 to 3.45)    | 2.71 (1.99 to 3.65)    | 0.71 (0.58 to 0.84)    | <0.001 |
| Ethiopia                              | 1.77 (1.34 to 2.36)    | 1.94 (1.46 to 2.56)    | 0.98 (0.93 to 1.02)    | <0.001 |
| Fiji                                  | 1.02 (0.76 to 1.35)    | 1.12 (0.84 to 1.47)    | 1.03 (0.99 to 1.08)    | <0.001 |
| Finland                               | 14.97 (13.34 to 16.7)  | 23.57 (18.97 to 28.49) | 5.11 (4.75 to 5.47)    | <0.001 |
| France                                | 8.56 (7.95 to 9.18)    | 6.99 (6.29 to 7.74)    | -1.92 (-2.6 to -1.24)  | <0.001 |
| Gabon                                 | 2.59 (1.89 to 3.45)    | 2.9 (2.13 to 3.87)     | 1.27 (1.2 to 1.34)     | <0.001 |
| Gambia                                | 2.01 (1.43 to 2.75)    | 2.24 (1.69 to 3.01)    | 1.22 (1.16 to 1.27)    | <0.001 |
| Georgia                               | 9.54 (7.16 to 12.98)   | 9.28 (7.04 to 12.41)   | -0.31 (-0.48 to -0.13) | 0.001  |
| Germany                               | 10.77 (8.34 to 14.17)  | 11.65 (9.12 to 15.14)  | 0.9 (0.83 to 0.97)     | <0.001 |
| Ghana                                 | 1.99 (1.45 to 2.81)    | 2.16 (1.59 to 2.97)    | 0.63 (0.2 to 1.05)     | 0.009  |
| Greece                                | 7.18 (6.12 to 8.35)    | 7.55 (6.52 to 8.72)    | 0.56 (0.47 to 0.64)    | <0.001 |
| Greenland                             | 31.63 (24.48 to 39.47) | 31.21 (24.28 to 39.2)  | -0.17 (-0.21 to -0.13) | <0.001 |
| Grenada                               | 3.9 (2.87 to 5.39)     | 4.46 (3.37 to 6.19)    | 1.5 (1.46 to 1.55)     | <0.001 |
| Guam                                  | 1.08 (0.82 to 1.44)    | 1.2 (0.9 to 1.57)      | 1.11 (1.06 to 1.15)    | <0.001 |
| Guatemala                             | 3.27 (2.45 to 4.31)    | 3.48 (2.63 to 4.6)     | 0.67 (0.58 to 0.75)    | <0.001 |

|                                  |                        |                        |                        |        |
|----------------------------------|------------------------|------------------------|------------------------|--------|
| Guinea                           | 1.72 (1.26 to 2.35)    | 1.93 (1.4 to 2.55)     | 1.31 (1.1 to 1.52)     | <0.001 |
| Guinea-Bissau                    | 1.81 (1.32 to 2.44)    | 2.02 (1.51 to 2.78)    | 1.24 (1.02 to 1.45)    | <0.001 |
| Guyana                           | 3.36 (2.45 to 4.68)    | 4.1 (2.99 to 5.66)     | 2.22 (2.03 to 2.4)     | <0.001 |
| Haiti                            | 2.72 (1.92 to 3.82)    | 3.28 (2.37 to 4.49)    | 2.11 (1.96 to 2.26)    | <0.001 |
| Honduras                         | 3.07 (2.33 to 4.03)    | 3.28 (2.47 to 4.32)    | 0.74 (0.6 to 0.88)     | <0.001 |
| Hungary                          | 14.63 (13.44 to 15.89) | 18.79 (16.8 to 21.04)  | 3.04 (2.77 to 3.3)     | <0.001 |
| Iceland                          | 16.47 (13.01 to 20.86) | 17.06 (13.16 to 21.56) | 0.34 (0.29 to 0.4)     | <0.001 |
| India                            | 3.82 (2.8 to 5.21)     | 4.08 (3 to 5.47)       | 0.62 (0.2 to 1.04)     | 0.004  |
| Indonesia                        | 0.71 (0.54 to 0.94)    | 0.77 (0.58 to 1.03)    | 0.71 (0.59 to 0.83)    | <0.001 |
| Iran (Islamic Republic of)       | 5.75 (3.98 to 8.12)    | 5.58 (3.85 to 7.83)    | -0.34 (-0.39 to -0.3)  | <0.001 |
| Iraq                             | 2.64 (1.91 to 3.77)    | 3.05 (2.2 to 4.31)     | 1.46 (1.28 to 1.64)    | <0.001 |
| Ireland                          | 8.59 (6.51 to 11.38)   | 9.28 (7.12 to 12.21)   | 0.93 (0.73 to 1.14)    | <0.001 |
| Israel                           | 6.38 (5.37 to 7.52)    | 6.81 (5.73 to 8)       | 0.73 (0.69 to 0.78)    | <0.001 |
| Italy                            | 17.15 (13.42 to 21.68) | 16.32 (12.69 to 20.8)  | -0.45 (-0.58 to -0.32) | <0.001 |
| Jamaica                          | 2.73 (1.97 to 3.8)     | 3.51 (2.52 to 4.87)    | 3.21 (2.85 to 3.57)    | <0.001 |
| Japan                            | 7.02 (5.07 to 9.55)    | 6.93 (4.96 to 9.43)    | -0.13 (-0.28 to 0.03)  | 0.115  |
| Jordan                           | 5.95 (4.09 to 8.41)    | 6.88 (4.73 to 10.33)   | 1.43 (1.1 to 1.76)     | <0.001 |
| Kazakhstan                       | 8.98 (6.72 to 12.06)   | 10.85 (8.15 to 14.78)  | 2.25 (1.78 to 2.71)    | <0.001 |
| Kenya                            | 1.78 (1.36 to 2.33)    | 2.32 (1.76 to 3.04)    | 2.81 (2.64 to 2.99)    | <0.001 |
| Kiribati                         | 0.78 (0.57 to 1.07)    | 0.85 (0.63 to 1.13)    | 0.86 (0.79 to 0.92)    | <0.001 |
| Kuwait                           | 4.6 (3.39 to 6.21)     | 5.11 (3.65 to 7.17)    | 1.18 (1.1 to 1.25)     | <0.001 |
| Kyrgyzstan                       | 9.34 (7.05 to 12.4)    | 9.6 (7.19 to 12.98)    | 0.12 (-0.15 to 0.39)   | 0.335  |
| Lao People's Democratic Republic | 0.52 (0.38 to 0.71)    | 0.61 (0.45 to 0.81)    | 1.7 (1.64 to 1.76)     | <0.001 |
| Latvia                           | 7.52 (5.64 to 9.99)    | 7.44 (5.58 to 9.82)    | -0.11 (-0.17 to -0.04) | 0.003  |
| Lebanon                          | 4.18 (2.88 to 6)       | 4.49 (3.17 to 6.27)    | 0.71 (0.62 to 0.8)     | <0.001 |
| Lesotho                          | 2.29 (1.66 to 3.12)    | 2.44 (1.81 to 3.2)     | 0.75 (0.59 to 0.9)     | <0.001 |
| Liberia                          | 1.91 (1.39 to 2.65)    | 2.18 (1.61 to 2.91)    | 1.49 (1.39 to 1.58)    | <0.001 |
| Libya                            | 2.96 (2.08 to 4.13)    | 3.52 (2.51 to 4.88)    | 2.01 (1.56 to 2.46)    | <0.001 |
| Lithuania                        | 7.58 (6.6 to 8.58)     | 8.34 (7.34 to 9.36)    | 1.13 (1.06 to 1.21)    | <0.001 |
| Luxembourg                       | 14.83 (11.17 to 19.41) | 14.95 (11.5 to 19.66)  | 0.2 (0.01 to 0.39)     | 0.039  |
| Madagascar                       | 1.82 (1.38 to 2.35)    | 1.89 (1.4 to 2.52)     | 0.48 (0.42 to 0.54)    | <0.001 |
| Malawi                           | 1.74 (1.3 to 2.32)     | 1.89 (1.42 to 2.48)    | 0.94 (0.85 to 1.03)    | <0.001 |
| Malaysia                         | 0.73 (0.6 to 0.88)     | 0.84 (0.68 to 1.04)    | 1.63 (1.58 to 1.68)    | <0.001 |
| Maldives                         | 0.56 (0.41 to 0.76)    | 0.63 (0.46 to 0.84)    | 1.31 (1.22 to 1.4)     | <0.001 |
| Mali                             | 1.67 (1.23 to 2.28)    | 1.89 (1.38 to 2.51)    | 1.39 (1.13 to 1.65)    | <0.001 |
| Malta                            | 7.26 (5.78 to 9.03)    | 7.45 (5.94 to 9.27)    | 0.28 (0.23 to 0.33)    | <0.001 |
| Marshall Islands                 | 0.87 (0.64 to 1.15)    | 0.97 (0.72 to 1.29)    | 1.25 (1.19 to 1.31)    | <0.001 |
| Mauritania                       | 1.93 (1.4 to 2.62)     | 2.04 (1.5 to 2.81)     | 0.64 (0.48 to 0.81)    | <0.001 |
| Mauritius                        | 0.66 (0.49 to 0.89)    | 0.74 (0.56 to 0.98)    | 1.23 (1.17 to 1.3)     | <0.001 |
| Mexico                           | 4.66 (3.62 to 6.02)    | 5.1 (3.93 to 6.57)     | 0.99 (0.91 to 1.08)    | <0.001 |

|                                  |                        |                        |                        |        |
|----------------------------------|------------------------|------------------------|------------------------|--------|
| Micronesia (Federated States of) | 0.91 (0.67 to 1.21)    | 1.01 (0.77 to 1.37)    | 1.26 (1.21 to 1.31)    | <0.001 |
| Monaco                           | 10.16 (7.7 to 13.31)   | 10.19 (7.76 to 13.38)  | -0.01 (-0.22 to 0.19)  | 0.901  |
| Mongolia                         | 10.76 (7.86 to 14.66)  | 11.19 (8.49 to 14.91)  | 0.3 (0.13 to 0.47)     | 0.004  |
| Montenegro                       | 10.09 (7.47 to 13.43)  | 10.45 (8.05 to 13.84)  | 0.38 (0.2 to 0.56)     | <0.001 |
| Morocco                          | 1.99 (1.46 to 2.64)    | 2.15 (1.58 to 2.97)    | 0.86 (0.8 to 0.93)     | <0.001 |
| Mozambique                       | 1.63 (1.23 to 2.14)    | 1.73 (1.28 to 2.29)    | 0.64 (0.52 to 0.75)    | <0.001 |
| Myanmar                          | 0.56 (0.41 to 0.74)    | 0.65 (0.48 to 0.85)    | 1.7 (1.63 to 1.76)     | <0.001 |
| Namibia                          | 2.59 (1.93 to 3.46)    | 2.49 (1.86 to 3.33)    | -0.42 (-0.47 to -0.37) | <0.001 |
| Nauru                            | 0.98 (0.74 to 1.31)    | 0.92 (0.68 to 1.25)    | -0.81 (-1.24 to -0.38) | <0.001 |
| Nepal                            | 2.84 (2.05 to 3.87)    | 3.13 (2.31 to 4.26)    | 1.23 (0.79 to 1.68)    | <0.001 |
| Netherlands                      | 11.5 (9.71 to 13.47)   | 8.59 (6.74 to 10.82)   | -3.29 (-3.87 to -2.71) | <0.001 |
| New Zealand                      | 21.55 (17.25 to 26.13) | 21.64 (17.43 to 26.5)  | 0.12 (0.04 to 0.2)     | 0.008  |
| Nicaragua                        | 3.44 (2.63 to 4.41)    | 3.1 (2.33 to 4.06)     | -1.24 (-1.45 to -1.03) | <0.001 |
| Niger                            | 1.46 (1.05 to 2.03)    | 1.62 (1.19 to 2.2)     | 1.22 (0.98 to 1.46)    | <0.001 |
| Nigeria                          | 2.17 (1.61 to 2.96)    | 2.6 (1.93 to 3.47)     | 2.1 (1.75 to 2.46)     | <0.001 |
| Niue                             | 1.01 (0.77 to 1.33)    | 1.11 (0.84 to 1.46)    | 1.01 (0.9 to 1.13)     | <0.001 |
| North Macedonia                  | 11.86 (8.91 to 15.88)  | 11.63 (8.83 to 15.52)  | -0.24 (-0.3 to -0.19)  | <0.001 |
| Northern Mariana Islands         | 1.09 (0.82 to 1.47)    | 1.19 (0.9 to 1.58)     | 0.96 (0.86 to 1.05)    | <0.001 |
| Norway                           | 23.82 (17.98 to 30.87) | 23.97 (17.99 to 31.07) | 0.09 (-0.01 to 0.19)   | 0.089  |
| Oman                             | 3.46 (2.46 to 4.8)     | 3.27 (2.32 to 4.66)    | -0.6 (-0.94 to -0.25)  | 0.001  |
| Pakistan                         | 3.72 (2.72 to 5.04)    | 3.95 (2.9 to 5.31)     | 0.73 (0.66 to 0.81)    | <0.001 |
| Palau                            | 1.04 (0.79 to 1.39)    | 1.17 (0.89 to 1.56)    | 1.26 (1.15 to 1.37)    | <0.001 |
| Palestine                        | 3.58 (2.49 to 5)       | 3.99 (2.79 to 5.45)    | 1.21 (1.14 to 1.28)    | <0.001 |
| Panama                           | 3.06 (2.29 to 4.01)    | 3.31 (2.53 to 4.3)     | 0.99 (0.83 to 1.16)    | <0.001 |
| Papua New Guinea                 | 0.7 (0.52 to 0.97)     | 0.8 (0.59 to 1.08)     | 1.4 (1.33 to 1.48)     | <0.001 |
| Paraguay                         | 7.67 (6.01 to 9.69)    | 7.01 (5.45 to 9.06)    | -1.01 (-1.15 to -0.86) | <0.001 |
| Peru                             | 3.17 (2.39 to 4.27)    | 3.61 (2.73 to 4.72)    | 1.5 (1.27 to 1.74)     | <0.001 |
| Philippines                      | 0.75 (0.55 to 0.99)    | 0.87 (0.66 to 1.15)    | 1.8 (1.68 to 1.91)     | <0.001 |
| Poland                           | 15.34 (11.83 to 19.81) | 13.98 (10.87 to 18)    | -1.03 (-1.06 to -1)    | <0.001 |
| Portugal                         | 8.27 (6.98 to 9.67)    | 8.28 (7.03 to 9.54)    | 0.04 (-0.06 to 0.13)   | 0.44   |
| Puerto Rico                      | 3.07 (2.46 to 3.77)    | 3.68 (2.85 to 4.73)    | 2.04 (1.63 to 2.45)    | <0.001 |
| Qatar                            | 4.86 (3.4 to 6.95)     | 5.2 (3.68 to 7.49)     | 0.77 (0.68 to 0.86)    | <0.001 |
| Republic of Korea                | 5.9 (5.17 to 6.65)     | 6.45 (5.64 to 7.27)    | 1 (0.95 to 1.05)       | <0.001 |
| Republic of Moldova              | 4.68 (3.81 to 5.68)    | 5.15 (4.21 to 6.25)    | 1.07 (1.02 to 1.13)    | <0.001 |
| Romania                          | 4.62 (3.89 to 5.54)    | 5.42 (4.56 to 6.47)    | 1.75 (1.68 to 1.82)    | <0.001 |
| Russian Federation               | 13.73 (10.71 to 17.84) | 13.17 (10.45 to 16.67) | -0.43 (-0.52 to -0.33) | <0.001 |
| Rwanda                           | 1.83 (1.36 to 2.43)    | 1.8 (1.34 to 2.41)     | -0.16 (-0.31 to -0.01) | 0.04   |
| Saint Kitts and Nevis            | 3.45 (2.5 to 4.66)     | 4.24 (3.09 to 5.93)    | 2.26 (2 to 2.53)       | <0.001 |
| Saint Lucia                      | 3.12 (2.26 to 4.32)    | 3.67 (2.63 to 5)       | 1.91 (1.8 to 2.01)     | <0.001 |
| Saint Vincent and the Grenadines | 3.53 (2.55 to 4.88)    | 4.07 (3.03 to 5.56)    | 1.6 (1.38 to 1.82)     | <0.001 |



|                             |                        |                        |                        |        |
|-----------------------------|------------------------|------------------------|------------------------|--------|
| Samoa                       | 0.74 (0.55 to 1.01)    | 0.91 (0.68 to 1.2)     | 2.23 (2.08 to 2.38)    | <0.001 |
| San Marino                  | 9.5 (7.35 to 12.33)    | 9.66 (7.24 to 12.53)   | 0.24 (0.13 to 0.34)    | <0.001 |
| Sao Tome and Principe       | 1.63 (1.19 to 2.29)    | 2.14 (1.61 to 2.96)    | 3.19 (2.68 to 3.69)    | <0.001 |
| Saudi Arabia                | 2.69 (1.97 to 3.63)    | 2.98 (2.21 to 4.14)    | 1.15 (0.98 to 1.31)    | <0.001 |
| Senegal                     | 1.93 (1.41 to 2.58)    | 2.21 (1.65 to 2.89)    | 1.59 (1.36 to 1.81)    | <0.001 |
| Serbia                      | 11.84 (9.08 to 15.37)  | 12.17 (9.28 to 15.8)   | 0.35 (0.26 to 0.44)    | <0.001 |
| Seychelles                  | 0.66 (0.49 to 0.89)    | 0.75 (0.56 to 1)       | 1.25 (1.11 to 1.39)    | <0.001 |
| Sierra Leone                | 1.76 (1.28 to 2.42)    | 2.06 (1.53 to 2.71)    | 1.78 (1.49 to 2.08)    | <0.001 |
| Singapore                   | 2.41 (1.73 to 3.4)     | 2.41 (1.76 to 3.26)    | -0.07 (-0.18 to 0.05)  | 0.224  |
| Slovakia                    | 7.48 (5.86 to 9.66)    | 7.86 (6.14 to 10.04)   | 0.51 (0.46 to 0.56)    | <0.001 |
| Slovenia                    | 11.22 (8.74 to 14.49)  | 11.1 (8.66 to 14.4)    | -0.11 (-0.12 to -0.1)  | <0.001 |
| Solomon Islands             | 0.76 (0.56 to 1.03)    | 0.83 (0.62 to 1.13)    | 0.99 (0.94 to 1.04)    | <0.001 |
| Somalia                     | 1.31 (0.96 to 1.76)    | 1.3 (0.95 to 1.75)     | -0.08 (-0.15 to -0.01) | 0.038  |
| South Africa                | 2.75 (2.05 to 3.75)    | 2.89 (2.17 to 3.87)    | 0.7 (0.5 to 0.91)      | <0.001 |
| South Sudan                 | 1.75 (1.31 to 2.34)    | 1.78 (1.34 to 2.34)    | 0.17 (0.09 to 0.26)    | 0.001  |
| Spain                       | 11.11 (10.37 to 11.88) | 12.13 (11.08 to 13.34) | 0.96 (0.94 to 0.98)    | <0.001 |
| Sri Lanka                   | 1.12 (0.89 to 1.4)     | 1.26 (1.02 to 1.58)    | 1.32 (1.24 to 1.41)    | <0.001 |
| Sudan                       | 3.16 (2.21 to 4.63)    | 3.5 (2.45 to 5.04)     | 1.15 (1.12 to 1.18)    | <0.001 |
| Suriname                    | 3.33 (2.45 to 4.52)    | 3.89 (2.87 to 5.29)    | 1.82 (1.71 to 1.93)    | <0.001 |
| Sweden                      | 27.95 (23.15 to 33.56) | 29.53 (24.5 to 35.21)  | 0.56 (0.42 to 0.7)     | <0.001 |
| Switzerland                 | 11.65 (9.27 to 14.64)  | 11.02 (8.68 to 13.96)  | -0.52 (-0.63 to -0.41) | <0.001 |
| Syrian Arab Republic        | 3.33 (2.33 to 4.86)    | 4.35 (3.08 to 5.9)     | 3.23 (2.75 to 3.7)     | <0.001 |
| Taiwan (Province of China)  | 1.38 (1.1 to 1.72)     | 1.62 (1.3 to 2.01)     | 1.86 (1.66 to 2.06)    | <0.001 |
| Tajikistan                  | 8.89 (6.64 to 11.79)   | 9.68 (7.31 to 12.87)   | 0.95 (0.74 to 1.17)    | <0.001 |
| Thailand                    | 0.43 (0.31 to 0.59)    | 0.49 (0.36 to 0.65)    | 1.4 (1.3 to 1.5)       | <0.001 |
| Timor-Leste                 | 0.57 (0.42 to 0.75)    | 0.62 (0.45 to 0.83)    | 1.02 (0.97 to 1.08)    | <0.001 |
| Togo                        | 2.02 (1.5 to 2.7)      | 2.29 (1.72 to 3.03)    | 1.45 (1.18 to 1.73)    | <0.001 |
| Tokelau                     | 0.77 (0.57 to 1.02)    | 0.98 (0.73 to 1.32)    | 2.79 (2.59 to 2.98)    | <0.001 |
| Tonga                       | 0.9 (0.67 to 1.18)     | 1.01 (0.76 to 1.34)    | 1.31 (1.16 to 1.45)    | <0.001 |
| Trinidad and Tobago         | 4.1 (3 to 5.69)        | 4.74 (3.46 to 6.36)    | 1.64 (1.41 to 1.88)    | <0.001 |
| Tunisia                     | 3.45 (2.43 to 4.96)    | 3.51 (2.51 to 4.87)    | 0.18 (0.15 to 0.22)    | <0.001 |
| Turkey                      | 5.22 (4.21 to 6.5)     | 6.38 (4.66 to 8.72)    | 2.34 (2.12 to 2.55)    | <0.001 |
| Turkmenistan                | 11.44 (8.56 to 15.01)  | 12.11 (9.15 to 16.25)  | 0.71 (0.56 to 0.86)    | <0.001 |
| Tuvalu                      | 0.94 (0.71 to 1.22)    | 1.04 (0.79 to 1.38)    | 1.1 (1.03 to 1.17)     | <0.001 |
| Uganda                      | 1.66 (1.23 to 2.22)    | 1.84 (1.35 to 2.48)    | 1.15 (1.05 to 1.25)    | <0.001 |
| Ukraine                     | 11.06 (8.42 to 14.47)  | 11.17 (8.38 to 14.66)  | 0.14 (-0.05 to 0.33)   | 0.145  |
| United Arab Emirates        | 5.96 (4.2 to 8.25)     | 6.18 (4.28 to 8.73)    | 0.32 (0.15 to 0.49)    | <0.001 |
| United Kingdom              | 14.73 (11.57 to 18.49) | 14.42 (11.28 to 18.23) | -0.2 (-0.31 to -0.09)  | <0.001 |
| United Republic of Tanzania | 1.58 (1.17 to 2.11)    | 1.82 (1.31 to 2.41)    | 1.61 (1.49 to 1.73)    | <0.001 |
| United States of America    | 27.92 (23.12 to 33.46) | 28.87 (23.74 to 34.82) | 0.39 (0.36 to 0.41)    | <0.001 |

|                                    |                      |                      |                        |        |
|------------------------------------|----------------------|----------------------|------------------------|--------|
| United States Virgin Islands       | 3.91 (2.77 to 5.4)   | 4.21 (3.01 to 5.83)  | 0.8 (0.59 to 1.02)     | <0.001 |
| Uruguay                            | 1.45 (1.1 to 1.95)   | 1.59 (1.21 to 2.1)   | 1.06 (0.93 to 1.19)    | <0.001 |
| Uzbekistan                         | 9.64 (7.13 to 13.08) | 10.89 (8.15 to 14.7) | 1.4 (1.22 to 1.58)     | <0.001 |
| Vanuatu                            | 0.82 (0.6 to 1.09)   | 0.9 (0.66 to 1.21)   | 0.95 (0.84 to 1.05)    | <0.001 |
| Venezuela (Bolivarian Republic of) | 2.87 (2.18 to 3.71)  | 3.23 (2.44 to 4.19)  | 1.31 (1.17 to 1.46)    | <0.001 |
| Viet Nam                           | 0.84 (0.61 to 1.14)  | 1 (0.74 to 1.36)     | 2.02 (1.85 to 2.18)    | <0.001 |
| Yemen                              | 3.06 (2.17 to 4.49)  | 3.12 (2.18 to 4.38)  | 0.2 (0.14 to 0.25)     | <0.001 |
| Zambia                             | 2.02 (1.5 to 2.69)   | 1.87 (1.37 to 2.51)  | -0.96 (-1.23 to -0.68) | <0.001 |
| Zimbabwe                           | 2.2 (1.64 to 2.97)   | 2.36 (1.79 to 3.11)  | 0.84 (0.68 to 0.99)    | <0.001 |

Abbreviation: ASIR: age-standardize incidence rate; APC: annual percentage change; CI: confidence interval; UI: uncertainty interval

**Supplementary Material Table S4.** Age-specific disability adjusted life years rates (ASDALYs) of inflammatory bowel disease in patients aged 65-89 years in 2010 and 2019, stratified by countries.

| Countries           | 2010 ASDALYs, per 100,000 (95% UI) | 2019 ASDALYs, per 100,000 (95% UI) | APC (95% CI)           | <i>p</i> |
|---------------------|------------------------------------|------------------------------------|------------------------|----------|
| Afghanistan         | 49.66 (30.58 to 81.02)             | 48.25 (30.06 to 75.89)             | -0.23 (-0.34 to -0.11) | 0.002    |
| Albania             | 48.92 (36.13 to 69.55)             | 51.15 (37.28 to 69.65)             | 0.51 (0.42 to 0.6)     | <0.001   |
| Algeria             | 26.08 (18.46 to 36.92)             | 24.86 (17.95 to 33.49)             | -0.51 (-0.62 to -0.4)  | <0.001   |
| American Samoa      | 72.1 (56.77 to 91.21)              | 47.72 (33.86 to 78.25)             | -4.63 (-5.52 to -3.73) | <0.001   |
| Andorra             | 91.53 (62.17 to 123.4)             | 93.42 (60.81 to 128.87)            | 0.11 (-0.19 to 0.41)   | 0.46     |
| Angola              | 61.79 (41.52 to 93.73)             | 60.09 (41.14 to 89.55)             | -0.25 (-0.51 to 0.01)  | 0.055    |
| Antigua and Barbuda | 75.19 (63.35 to 95.31)             | 70.46 (55.61 to 93.47)             | -0.64 (-1 to -0.29)    | <0.001   |
| Argentina           | 28.26 (25.18 to 33.04)             | 30.49 (26 to 36.06)                | 1.26 (0.73 to 1.8)     | 0.001    |
| Armenia             | 47.45 (37.2 to 60.82)              | 48.32 (37.8 to 61.47)              | 0.24 (0.06 to 0.43)    | 0.016    |
| Australia           | 107.31 (80.57 to 123.31)           | 101.7 (78.84 to 118.83)            | -0.72 (-0.95 to -0.49) | <0.001   |
| Austria             | 143.59 (119.32 to 174.51)          | 102.42 (81.07 to 138.08)           | -3.64 (-4.12 to -3.15) | <0.001   |
| Azerbaijan          | 34.62 (24.65 to 47.23)             | 35.76 (25.19 to 49.43)             | 0.43 (0.16 to 0.7)     | 0.002    |
| Bahamas             | 48.83 (41.33 to 58.33)             | 47.31 (38.35 to 58.54)             | -0.36 (-0.66 to -0.05) | 0.023    |
| Bahrain             | 29.18 (23.45 to 36.19)             | 24.2 (18.2 to 31.17)               | -1.88 (-2.5 to -1.27)  | <0.001   |
| Bangladesh          | 68.82 (42.65 to 104.68)            | 58.49 (35.86 to 88.04)             | -1.67 (-2.36 to -0.98) | <0.001   |
| Barbados            | 55.93 (45.57 to 68.33)             | 54.89 (43.28 to 68.14)             | -0.33 (-0.73 to 0.07)  | 0.105    |
| Belarus             | 62.79 (50.53 to 77.7)              | 60.67 (47 to 78.13)                | -0.51 (-0.89 to -0.13) | 0.015    |
| Belgium             | 142.76 (103.52 to 161.03)          | 121.84 (99.37 to 142.2)            | -1.9 (-2.83 to -0.97)  | <0.001   |
| Belize              | 59.77 (49.73 to 77.24)             | 55.27 (44.82 to 73.96)             | -0.78 (-1.38 to -0.17) | 0.019    |
| Benin               | 38.56 (25.1 to 57.01)              | 40.19 (28.37 to 55.51)             | 0.34 (-0.19 to 0.87)   | 0.204    |

|                                       |                           |                           |                        |        |
|---------------------------------------|---------------------------|---------------------------|------------------------|--------|
| Bermuda                               | 48.58 (40.57 to 61.31)    | 43.56 (34.22 to 57.51)    | -1.03 (-1.59 to -0.47) | <0.001 |
| Bhutan                                | 64.82 (40.24 to 144.19)   | 61.64 (38.25 to 135.8)    | -0.5 (-0.56 to -0.44)  | <0.001 |
| Bolivia (Plurinational State of)      | 43.22 (32 to 56.13)       | 42.93 (32.23 to 56.9)     | -0.09 (-0.17 to -0.02) | 0.018  |
| Bosnia and Herzegovina                | 69.43 (49.21 to 85.96)    | 77.23 (49.21 to 100.2)    | 1.65 (1.09 to 2.21)    | <0.001 |
| Botswana                              | 69.82 (49.67 to 97.02)    | 60.49 (42.04 to 85.3)     | -1.58 (-1.72 to -1.44) | <0.001 |
| Brazil                                | 58.87 (50.95 to 69.61)    | 57.07 (49.46 to 67.34)    | -0.31 (-0.64 to 0.03)  | 0.076  |
| Brunei Darussalam                     | 135.61 (98.32 to 166.34)  | 121.24 (87.91 to 153.18)  | -1.25 (-1.47 to -1.03) | <0.001 |
| Bulgaria                              | 52.41 (41.2 to 65.84)     | 54.46 (42.81 to 69.39)    | 0.3 (0.11 to 0.49)     | 0.007  |
| Burkina Faso                          | 58.58 (36.99 to 86.52)    | 57.14 (33.77 to 87.49)    | -0.33 (-0.82 to 0.16)  | 0.187  |
| Burundi                               | 64.74 (40.05 to 98.88)    | 71.61 (42.76 to 119.72)   | 1.12 (0.85 to 1.39)    | <0.001 |
| Côte d'Ivoire                         | 37.66 (22.99 to 56.62)    | 36.52 (23.82 to 54.08)    | -0.41 (-0.78 to -0.03) | 0.036  |
| Cabo Verde                            | 25.22 (18.66 to 32.55)    | 27.31 (20.31 to 35.67)    | 1.67 (-2.33 to 5.83)   | 0.42   |
| Cambodia                              | 41.5 (25.61 to 57.15)     | 38.15 (24.98 to 51.6)     | -0.92 (-1.09 to -0.75) | <0.001 |
| Cameroon                              | 35.76 (20.55 to 55.05)    | 33.49 (19.89 to 51.08)    | -0.75 (-1 to -0.49)    | <0.001 |
| Canada                                | 151.05 (121.76 to 185.01) | 129.76 (102.36 to 166.28) | -1.71 (-1.98 to -1.45) | <0.001 |
| Central African Republic              | 86.53 (52.06 to 144.55)   | 82.83 (49.19 to 138.11)   | -0.46 (-0.59 to -0.32) | <0.001 |
| Chad                                  | 56.67 (35.49 to 89.05)    | 51.6 (34.65 to 75.89)     | -1.04 (-1.25 to -0.84) | <0.001 |
| Chile                                 | 33.72 (28.26 to 45.03)    | 35.62 (29.92 to 45.51)    | 0.93 (0.25 to 1.62)    | 0.008  |
| China                                 | 50.57 (41.58 to 57.61)    | 40.13 (33.09 to 47.95)    | -2.56 (-2.71 to -2.42) | <0.001 |
| Colombia                              | 42.12 (35.75 to 50.33)    | 39.42 (30.85 to 49.41)    | -0.76 (-0.94 to -0.58) | <0.001 |
| Comoros                               | 80.34 (47.74 to 131.07)   | 76.81 (47.53 to 126.18)   | -0.52 (-0.77 to -0.27) | <0.001 |
| Congo                                 | 74.74 (49.32 to 109.47)   | 64.36 (45.65 to 91.27)    | -1.63 (-1.8 to -1.45)  | <0.001 |
| Cook Islands                          | 69.04 (48.53 to 94.6)     | 63.42 (42.78 to 88.57)    | -1.04 (-1.23 to -0.86) | <0.001 |
| Costa Rica                            | 29.92 (24.18 to 36.85)    | 29.58 (22.64 to 37.51)    | 0.18 (-0.46 to 0.83)   | 0.53   |
| Croatia                               | 73.28 (61.63 to 87.3)     | 73.08 (57.57 to 90.46)    | -0.09 (-0.36 to 0.18)  | 0.46   |
| Cuba                                  | 29.37 (24.59 to 35.02)    | 29.96 (23.76 to 37.66)    | 0.71 (0.14 to 1.3)     | 0.021  |
| Cyprus                                | 114.78 (86.9 to 141.97)   | 96.22 (75.23 to 119.03)   | -1.83 (-2.4 to -1.26)  | <0.001 |
| Czechia                               | 91.45 (70.64 to 106.13)   | 89.85 (71.85 to 110.72)   | -0.13 (-0.36 to 0.09)  | 0.253  |
| Democratic People's Republic of Korea | 42.63 (30.6 to 58.94)     | 42.02 (29.41 to 57.39)    | -0.15 (-0.22 to -0.09) | <0.001 |
| Democratic Republic of the Congo      | 55.28 (37.92 to 79.05)    | 53.39 (36.19 to 77.87)    | -0.33 (-0.57 to -0.1)  | 0.006  |
| Denmark                               | 106.12 (90.94 to 123.08)  | 93.38 (79.13 to 110.32)   | -1.36 (-1.61 to -1.1)  | <0.001 |
| Djibouti                              | 56.18 (33.66 to 100.36)   | 54.04 (34.73 to 89.34)    | -0.48 (-0.66 to -0.3)  | <0.001 |
| Dominica                              | 76.93 (59.67 to 98.48)    | 75.36 (55.61 to 103.03)   | -0.34 (-0.62 to -0.05) | 0.027  |
| Dominican Republic                    | 25.19 (19.44 to 31.94)    | 25.78 (19.45 to 33.45)    | 0.41 (-0.01 to 0.82)   | 0.054  |
| Ecuador                               | 25.61 (21.42 to 30.44)    | 27.64 (21.29 to 34.69)    | 1 (0.58 to 1.41)       | <0.001 |
| Egypt                                 | 30.53 (20.39 to 50.11)    | 31.01 (19.44 to 48.13)    | 0.26 (0.03 to 0.49)    | 0.034  |
| El Salvador                           | 23.72 (19.26 to 29.38)    | 24.12 (18.41 to 31.04)    | 0.13 (-0.27 to 0.53)   | 0.535  |
| Equatorial Guinea                     | 58.26 (33.93 to 91.19)    | 56.74 (35.22 to 89.4)     | -0.16 (-0.36 to 0.05)  | 0.115  |
| Eritrea                               | 69.69 (41.75 to 113.85)   | 70.65 (44.85 to 107.9)    | 0.17 (0.1 to 0.25)     | <0.001 |
| Estonia                               | 51.58 (42.09 to 63.26)    | 57.83 (44.35 to 73.74)    | 1.35 (1.11 to 1.6)     | <0.001 |

|                                  |                           |                           |                        |        |
|----------------------------------|---------------------------|---------------------------|------------------------|--------|
| Eswatini                         | 67.87 (46.12 to 97.75)    | 57.3 (41.46 to 77.62)     | -1.85 (-1.94 to -1.76) | <0.001 |
| Ethiopia                         | 70.39 (42.35 to 103.83)   | 76.23 (43.77 to 115.32)   | 0.91 (0.78 to 1.04)    | <0.001 |
| Fiji                             | 23.67 (19.31 to 28.83)    | 23.01 (16.45 to 30.94)    | -0.36 (-0.47 to -0.24) | <0.001 |
| Finland                          | 78.91 (63.61 to 96.81)    | 85.06 (66.22 to 108.12)   | 0.92 (0.5 to 1.34)     | <0.001 |
| France                           | 134.82 (92.89 to 150.98)  | 135.47 (85.36 to 162.22)  | 0 (-0.49 to 0.49)      | 0.997  |
| Gabon                            | 60.58 (42.81 to 88.07)    | 54.52 (37.6 to 79.85)     | -1.04 (-1.23 to -0.86) | <0.001 |
| Gambia                           | 41.7 (28.31 to 57.68)     | 41.8 (28.39 to 57.9)      | 0.61 (0.04 to 1.19)    | 0.039  |
| Georgia                          | 44.29 (33.64 to 56.76)    | 56.87 (41.29 to 73.52)    | 2.69 (2.46 to 2.91)    | <0.001 |
| Germany                          | 226.03 (186.34 to 251.63) | 243.57 (190.5 to 278.51)  | 0.78 (0.24 to 1.31)    | 0.004  |
| Ghana                            | 47.76 (28.29 to 71.01)    | 49.65 (29.04 to 77.08)    | 0.36 (0 to 0.73)       | 0.047  |
| Greece                           | 33.67 (26.63 to 42.81)    | 36.87 (30.39 to 44.35)    | 0.92 (0.46 to 1.39)    | <0.001 |
| Greenland                        | 109.1 (78.01 to 136.32)   | 109.32 (72.55 to 138.91)  | 0.04 (-0.16 to 0.25)   | 0.683  |
| Grenada                          | 117.81 (97 to 143.41)     | 122.02 (98.81 to 152.25)  | 0.56 (-0.71 to 1.84)   | 0.388  |
| Guam                             | 23.18 (17.17 to 30.17)    | 16.29 (11.69 to 22.68)    | -3.68 (-4.56 to -2.79) | <0.001 |
| Guatemala                        | 31.88 (25.54 to 38.98)    | 34.7 (26.14 to 43.05)     | 0.69 (-0.05 to 1.44)   | 0.068  |
| Guinea                           | 37.15 (21.54 to 63.45)    | 34.15 (20.67 to 52.08)    | -0.92 (-1.03 to -0.8)  | <0.001 |
| Guinea-Bissau                    | 54.49 (36.05 to 75.91)    | 49.84 (33.52 to 71.61)    | -0.98 (-1.05 to -0.9)  | <0.001 |
| Guyana                           | 80.68 (67.51 to 101.95)   | 82.17 (61.75 to 108.06)   | 0.34 (-0.08 to 0.75)   | 0.097  |
| Haiti                            | 100.57 (58.04 to 168.19)  | 92.99 (54.85 to 152.06)   | -0.73 (-0.85 to -0.62) | <0.001 |
| Honduras                         | 87.52 (54.21 to 121.61)   | 91.34 (56.72 to 126)      | 0.66 (0.27 to 1.04)    | 0.001  |
| Hungary                          | 137.27 (112.23 to 166.26) | 126.29 (98.54 to 158.47)  | -0.86 (-1.14 to -0.57) | <0.001 |
| Iceland                          | 106.61 (88.45 to 127.73)  | 100.9 (80.1 to 123.12)    | -0.9 (-1.29 to -0.51)  | 0.001  |
| India                            | 47.76 (37.59 to 63.88)    | 43.79 (32.9 to 55.95)     | -1 (-1.28 to -0.72)    | <0.001 |
| Indonesia                        | 62.4 (38.86 to 79.14)     | 58.95 (35.88 to 75.82)    | -0.49 (-0.9 to -0.07)  | 0.023  |
| Iran (Islamic Republic of)       | 26.54 (19.75 to 33.06)    | 31.88 (19.37 to 40.09)    | 2.11 (1.84 to 2.38)    | <0.001 |
| Iraq                             | 24.17 (17.92 to 34.72)    | 21.46 (15.69 to 31.5)     | -1.31 (-1.61 to -1)    | <0.001 |
| Ireland                          | 107.65 (90.12 to 123.85)  | 86.21 (71.07 to 105.86)   | -2.47 (-2.69 to -2.26) | <0.001 |
| Israel                           | 57.63 (49.24 to 70.2)     | 47.92 (39.5 to 62.58)     | -2.11 (-2.48 to -1.73) | <0.001 |
| Italy                            | 142.12 (106.59 to 165.85) | 129.96 (101.76 to 153.27) | -1.48 (-2.12 to -0.84) | 0.001  |
| Jamaica                          | 30.94 (24.96 to 40.95)    | 29.43 (21.92 to 41.01)    | -0.59 (-0.89 to -0.3)  | <0.001 |
| Japan                            | 31.91 (24.36 to 41.54)    | 31.22 (23.65 to 40.4)     | -0.25 (-0.33 to -0.17) | <0.001 |
| Jordan                           | 52.08 (40.14 to 67.83)    | 48.14 (36.59 to 63.54)    | -0.73 (-1.13 to -0.33) | <0.001 |
| Kazakhstan                       | 76.39 (61.27 to 93.5)     | 62.08 (47.64 to 78.38)    | -2.63 (-3.7 to -1.55)  | <0.001 |
| Kenya                            | 83.21 (49.54 to 129.93)   | 87.81 (51.79 to 130.59)   | 0.55 (0.33 to 0.77)    | <0.001 |
| Kiribati                         | 95.73 (58.57 to 163.42)   | 82.37 (53.06 to 132.52)   | -1.62 (-1.85 to -1.39) | <0.001 |
| Kuwait                           | 29.13 (23.65 to 35.39)    | 28.01 (21.58 to 36.81)    | -0.32 (-1.23 to 0.61)  | 0.5    |
| Kyrgyzstan                       | 35.75 (28 to 45.55)       | 35.53 (26.94 to 46.59)    | -0.17 (-0.58 to 0.25)  | 0.425  |
| Lao People's Democratic Republic | 28.63 (15.38 to 50.54)    | 26.42 (14.25 to 44.86)    | -0.89 (-0.96 to -0.82) | <0.001 |
| Latvia                           | 65.43 (53.1 to 80.02)     | 64.33 (50.76 to 79.81)    | -0.17 (-0.37 to 0.04)  | 0.105  |
| Lebanon                          | 25.08 (17.03 to 33.78)    | 25.53 (16.2 to 36.32)     | 0.17 (0.1 to 0.25)     | 0.001  |

|                                  |                           |                           |                        |        |
|----------------------------------|---------------------------|---------------------------|------------------------|--------|
| Lesotho                          | 72.26 (50.5 to 99.69)     | 68.55 (48.5 to 95.89)     | -0.56 (-0.79 to -0.33) | <0.001 |
| Liberia                          | 39.25 (22.24 to 60.2)     | 37.92 (24.83 to 54.44)    | -0.49 (-1.28 to 0.32)  | 0.237  |
| Libya                            | 28.6 (20.81 to 38.82)     | 28.74 (19.54 to 40.96)    | 0.06 (-0.55 to 0.68)   | 0.846  |
| Lithuania                        | 60.66 (49.02 to 73.17)    | 60.48 (47.78 to 74.68)    | -0.12 (-0.69 to 0.47)  | 0.66   |
| Luxembourg                       | 158.52 (131.93 to 184.96) | 137.9 (107.78 to 164.31)  | -1.62 (-2.06 to -1.18) | <0.001 |
| Madagascar                       | 51.44 (32.23 to 81.57)    | 56.18 (36.01 to 83.8)     | 0.97 (0.83 to 1.11)    | <0.001 |
| Malawi                           | 61.38 (41.16 to 89.93)    | 65.55 (42.7 to 102.14)    | 0.7 (0.23 to 1.17)     | 0.003  |
| Malaysia                         | 20.39 (15.54 to 28.81)    | 18.56 (12.55 to 26.82)    | -1.3 (-2.76 to 0.18)   | 0.086  |
| Maldives                         | 35.08 (26.49 to 46.62)    | 32.98 (23.67 to 45.02)    | -0.62 (-0.7 to -0.55)  | <0.001 |
| Mali                             | 40.66 (25.34 to 64.16)    | 39.55 (24.38 to 59)       | -0.12 (-0.36 to 0.13)  | 0.313  |
| Malta                            | 76.69 (62.53 to 89.31)    | 71.71 (56.72 to 86.25)    | -1.12 (-1.52 to -0.72) | <0.001 |
| Marshall Islands                 | 71.68 (42.26 to 106.68)   | 58.78 (34.62 to 93.24)    | -2.21 (-2.37 to -2.05) | <0.001 |
| Mauritania                       | 47.44 (32.51 to 68.48)    | 40.3 (27.64 to 56.16)     | -1.71 (-1.89 to -1.53) | <0.001 |
| Mauritius                        | 22.12 (18.22 to 25.81)    | 21.88 (16.29 to 28.2)     | 0.3 (-1.23 to 1.85)    | 0.702  |
| Mexico                           | 52.76 (45.04 to 60.2)     | 56.9 (46.69 to 67.17)     | 0.79 (0.42 to 1.16)    | <0.001 |
| Micronesia (Federated States of) | 73.52 (44.54 to 110.1)    | 60.44 (37.73 to 92.13)    | -2.19 (-2.3 to -2.08)  | <0.001 |
| Monaco                           | 64.92 (50.68 to 79.75)    | 61.43 (46.66 to 79.22)    | -0.62 (-0.65 to -0.58) | <0.001 |
| Mongolia                         | 59.55 (45.4 to 77.96)     | 53.27 (39.57 to 69.11)    | -1.32 (-1.53 to -1.1)  | <0.001 |
| Montenegro                       | 64.98 (50.67 to 82.59)    | 60.45 (46.05 to 77.65)    | -0.76 (-0.82 to -0.7)  | <0.001 |
| Morocco                          | 25.03 (17.42 to 36.39)    | 25.74 (18.62 to 33.74)    | 0.47 (-0.23 to 1.17)   | 0.188  |
| Mozambique                       | 77.03 (51.36 to 113.71)   | 86.79 (56.04 to 128.5)    | 1.45 (0.94 to 1.97)    | <0.001 |
| Myanmar                          | 15.15 (10.41 to 20.94)    | 13.06 (9.6 to 17.52)      | -1.64 (-1.73 to -1.54) | <0.001 |
| Namibia                          | 69 (51.79 to 91.36)       | 65.63 (47.81 to 89.73)    | -0.49 (-0.72 to -0.27) | <0.001 |
| Nauru                            | 73.1 (47.07 to 106.95)    | 59.34 (37.48 to 90.44)    | -2.32 (-2.75 to -1.88) | <0.001 |
| Nepal                            | 64.54 (38.21 to 117.83)   | 62.84 (39.46 to 107.7)    | -0.18 (-0.3 to -0.06)  | 0.01   |
| Netherlands                      | 225.31 (185.09 to 250.12) | 201.31 (164.27 to 231.71) | -1.3 (-1.6 to -1)      | <0.001 |
| New Zealand                      | 67.57 (56.48 to 81.19)    | 65.66 (54.25 to 79.43)    | -0.4 (-0.95 to 0.15)   | 0.15   |
| Nicaragua                        | 26.09 (21.43 to 31.37)    | 27.93 (21.84 to 34.46)    | 1.11 (0.73 to 1.48)    | <0.001 |
| Niger                            | 40.58 (23.53 to 65.66)    | 44.18 (27.31 to 69.74)    | 0.93 (0.62 to 1.24)    | <0.001 |
| Nigeria                          | 55.49 (27.54 to 91.39)    | 51.5 (28.46 to 81.44)     | -0.83 (-0.98 to -0.67) | <0.001 |
| Niue                             | 67.88 (43.09 to 97.82)    | 60.57 (36.33 to 89.33)    | -1.22 (-1.29 to -1.14) | <0.001 |
| North Macedonia                  | 40.99 (30.87 to 54.26)    | 41.68 (31.05 to 56.2)     | 0.29 (0.15 to 0.42)    | 0.001  |
| Northern Mariana Islands         | 58.42 (44.87 to 76.26)    | 32.2 (21.37 to 60.59)     | -6.58 (-7.69 to -5.46) | <0.001 |
| Norway                           | 126.57 (97.56 to 163.26)  | 121.22 (91.41 to 158.88)  | -0.56 (-0.67 to -0.45) | <0.001 |
| Oman                             | 37.57 (22.72 to 60.77)    | 32.1 (20.71 to 47.42)     | -1.86 (-2.51 to -1.21) | <0.001 |
| Pakistan                         | 68.09 (41.31 to 117.06)   | 61.87 (40.58 to 98.09)    | -1.05 (-1.2 to -0.9)   | <0.001 |
| Palau                            | 55.81 (31.43 to 87.94)    | 44.67 (23.3 to 69.59)     | -2.62 (-2.84 to -2.39) | <0.001 |
| Palestine                        | 34.15 (27.22 to 42.48)    | 30.07 (22.98 to 40)       | -1.44 (-1.97 to -0.91) | <0.001 |
| Panama                           | 50.41 (42.31 to 63.12)    | 57.56 (44.36 to 72.06)    | 1.48 (-0.06 to 3.03)   | 0.059  |
| Papua New Guinea                 | 35.23 (21.76 to 55.16)    | 31.92 (19.69 to 48.86)    | -1.17 (-1.56 to -0.78) | <0.001 |

|                                  |                           |                           |                        |        |
|----------------------------------|---------------------------|---------------------------|------------------------|--------|
| Paraguay                         | 31.64 (25.36 to 38.66)    | 33.58 (24.42 to 43.08)    | 0.65 (0.13 to 1.18)    | 0.015  |
| Peru                             | 29.48 (22.99 to 37.83)    | 26.25 (19.28 to 35.01)    | -1.31 (-1.56 to -1.06) | <0.001 |
| Philippines                      | 19.64 (16.25 to 21.85)    | 16.95 (13.89 to 21.42)    | -1.66 (-2.12 to -1.21) | <0.001 |
| Poland                           | 91.68 (75.51 to 108.69)   | 92.28 (73.92 to 112.07)   | -0.05 (-0.49 to 0.39)  | 0.822  |
| Portugal                         | 128.89 (72.45 to 147.32)  | 120.73 (69 to 143.58)     | -0.87 (-1.39 to -0.36) | 0.001  |
| Puerto Rico                      | 34.5 (28.83 to 44.66)     | 30.37 (22.67 to 44.42)    | -1.47 (-2.29 to -0.64) | 0.001  |
| Qatar                            | 80.04 (37.36 to 112.62)   | 48.44 (26.26 to 72.05)    | -5.62 (-5.86 to -5.37) | <0.001 |
| Republic of Korea                | 42.85 (33.95 to 51.07)    | 36.7 (29.45 to 46.51)     | -1.75 (-1.98 to -1.51) | <0.001 |
| Republic of Moldova              | 38.08 (31.53 to 47.16)    | 40.16 (32.34 to 49.47)    | 0.85 (-0.28 to 1.99)   | 0.143  |
| Romania                          | 30.49 (25.09 to 37.58)    | 33.08 (26.33 to 41.03)    | 0.82 (0.22 to 1.42)    | 0.008  |
| Russian Federation               | 73.61 (63.85 to 85.74)    | 77.17 (63.52 to 91.74)    | 0.62 (-0.08 to 1.32)   | 0.085  |
| Rwanda                           | 60.13 (37.15 to 92.09)    | 60.87 (37.57 to 92.05)    | 0.19 (0.12 to 0.26)    | <0.001 |
| Saint Kitts and Nevis            | 140.67 (114.06 to 184.26) | 149.61 (115.64 to 211.13) | 0.78 (-0.75 to 2.34)   | 0.319  |
| Saint Lucia                      | 50.58 (42.12 to 64.02)    | 59.16 (46.73 to 75.75)    | 2.22 (1.71 to 2.74)    | <0.001 |
| Saint Vincent and the Grenadines | 100.3 (84.53 to 123.08)   | 105.6 (84.01 to 134.69)   | 0.71 (0.35 to 1.08)    | 0.002  |
| Samoa                            | 62.47 (43.3 to 88.43)     | 58.12 (42.17 to 79.16)    | -0.82 (-0.88 to -0.75) | <0.001 |
| San Marino                       | 62.68 (44.28 to 85.17)    | 60.71 (42.35 to 82.31)    | -0.36 (-0.45 to -0.27) | <0.001 |
| Sao Tome and Principe            | 41.52 (26.36 to 72.54)    | 32.81 (21.6 to 52.42)     | -2.49 (-2.68 to -2.3)  | <0.001 |
| Saudi Arabia                     | 24.79 (19.1 to 34.34)     | 21.8 (15.71 to 29.49)     | -1.51 (-1.68 to -1.34) | <0.001 |
| Senegal                          | 39.25 (25.03 to 63.06)    | 39.92 (25.03 to 59.73)    | 0.04 (-0.32 to 0.41)   | 0.826  |
| Serbia                           | 123.08 (89.21 to 145.83)  | 111.25 (79.83 to 139.34)  | -1.24 (-1.56 to -0.93) | <0.001 |
| Seychelles                       | 25.83 (18.41 to 34.42)    | 23.17 (16.46 to 31.88)    | -1.13 (-1.26 to -1.01) | <0.001 |
| Sierra Leone                     | 37.6 (24.42 to 53.82)     | 36.59 (23.51 to 52.01)    | -0.38 (-0.92 to 0.15)  | 0.161  |
| Singapore                        | 13.28 (10.79 to 17.65)    | 12.21 (9.46 to 16.57)     | -0.94 (-1.35 to -0.54) | <0.001 |
| Slovakia                         | 105.15 (79.68 to 122.27)  | 97.6 (70.94 to 123.91)    | -0.87 (-1.17 to -0.57) | <0.001 |
| Slovenia                         | 85.55 (64.86 to 102.74)   | 75.43 (57.8 to 95.54)     | -1.6 (-2.03 to -1.17)  | <0.001 |
| Solomon Islands                  | 40.16 (25.75 to 61.18)    | 38.05 (24.89 to 55.17)    | -0.64 (-0.92 to -0.36) | <0.001 |
| Somalia                          | 46.94 (26.28 to 78.92)    | 44.26 (26.08 to 71.68)    | -0.59 (-0.76 to -0.41) | <0.001 |
| South Africa                     | 50.21 (39.44 to 55.09)    | 41.01 (31.26 to 48.58)    | -1.8 (-2.26 to -1.33)  | <0.001 |
| South Sudan                      | 68.52 (35.22 to 158.7)    | 66.01 (32.77 to 142.37)   | -0.34 (-0.41 to -0.27) | <0.001 |
| Spain                            | 63.2 (53 to 79.14)        | 63.13 (51.65 to 80.01)    | -0.06 (-0.37 to 0.24)  | 0.683  |
| Sri Lanka                        | 13 (10.7 to 16.1)         | 11.44 (8.35 to 15.7)      | -1.48 (-1.61 to -1.34) | <0.001 |
| Sudan                            | 32.48 (17.51 to 58.76)    | 33.61 (20.32 to 55.17)    | 0.36 (0.21 to 0.5)     | <0.001 |
| Suriname                         | 65.46 (52.97 to 83.81)    | 63.94 (48.06 to 84.51)    | 0.08 (-0.26 to 0.42)   | 0.613  |
| Sweden                           | 112.8 (91.57 to 138.3)    | 97.94 (75.51 to 126.11)   | -1.6 (-1.87 to -1.33)  | <0.001 |
| Switzerland                      | 106.65 (89.67 to 124.09)  | 88.96 (73.62 to 107.92)   | -1.88 (-2.48 to -1.28) | <0.001 |
| Syrian Arab Republic             | 49.9 (28.41 to 65.33)     | 46.78 (24.8 to 67.23)     | -0.82 (-1 to -0.64)    | <0.001 |
| Taiwan (Province of China)       | 45.99 (38.39 to 68.22)    | 56.44 (44.2 to 73.61)     | 2.12 (1.73 to 2.5)     | <0.001 |
| Tajikistan                       | 46.17 (35.98 to 60.08)    | 45.8 (34.12 to 59.72)     | -0.08 (-0.31 to 0.15)  | 0.503  |
| Thailand                         | 11.53 (8.91 to 16.29)     | 11.88 (8.45 to 16.3)      | 0.91 (0.26 to 1.58)    | 0.013  |

|                                    |                           |                           |                        |        |
|------------------------------------|---------------------------|---------------------------|------------------------|--------|
| Timor-Leste                        | 39.81 (19.47 to 83.32)    | 38.41 (20.81 to 69.85)    | -0.6 (-0.85 to -0.34)  | 0.001  |
| Togo                               | 39.23 (27.03 to 55.56)    | 41.33 (26.8 to 58.9)      | 0.67 (0.05 to 1.29)    | 0.033  |
| Tokelau                            | 61.99 (44.35 to 86.6)     | 51.71 (37.01 to 71.17)    | -1.89 (-2.21 to -1.58) | <0.001 |
| Tonga                              | 77.97 (55.92 to 105.91)   | 73.83 (53.62 to 101.19)   | -0.68 (-0.78 to -0.59) | <0.001 |
| Trinidad and Tobago                | 37.09 (28.38 to 44.73)    | 34.69 (25.72 to 44.54)    | -0.08 (-0.88 to 0.73)  | 0.827  |
| Tunisia                            | 25.07 (18.28 to 33.08)    | 24.18 (17.47 to 32.27)    | -0.4 (-0.47 to -0.33)  | <0.001 |
| Turkey                             | 61.94 (50.05 to 82.63)    | 56.37 (42.54 to 81.1)     | -1.15 (-1.56 to -0.73) | <0.001 |
| Turkmenistan                       | 41.57 (32.87 to 52.97)    | 46.86 (35.53 to 61.08)    | 1.33 (1.03 to 1.62)    | <0.001 |
| Tuvalu                             | 63.64 (39.52 to 92.39)    | 56.06 (36.83 to 82.77)    | -1.4 (-1.53 to -1.27)  | <0.001 |
| Uganda                             | 57.68 (38.11 to 86.16)    | 60.89 (38.07 to 94.27)    | 0.65 (0.54 to 0.76)    | <0.001 |
| Ukraine                            | 45.37 (36.8 to 56.33)     | 47.76 (37.62 to 59.8)     | 0.64 (0.15 to 1.13)    | 0.01   |
| United Arab Emirates               | 45.23 (25.88 to 87.9)     | 33.56 (20.84 to 59.27)    | -3.81 (-5.06 to -2.55) | <0.001 |
| United Kingdom                     | 180.18 (154.95 to 199.6)  | 166.77 (145.44 to 186.46) | -0.84 (-1.08 to -0.6)  | <0.001 |
| United Republic of Tanzania        | 57.64 (39.52 to 83.34)    | 58.12 (38.27 to 91.83)    | 0.06 (-0.06 to 0.18)   | 0.333  |
| United States of America           | 156.29 (125.36 to 176.06) | 150.31 (123.45 to 169.36) | -0.51 (-0.75 to -0.27) | <0.001 |
| United States Virgin Islands       | 50.87 (40.38 to 63.83)    | 50.39 (38.74 to 64.86)    | -0.1 (-0.16 to -0.03)  | 0.003  |
| Uruguay                            | 49.91 (40.1 to 56.68)     | 47.94 (40.16 to 55.8)     | -0.89 (-1.48 to -0.29) | 0.009  |
| Uzbekistan                         | 39.58 (29.68 to 53.8)     | 41.06 (30.07 to 55.82)    | 0.61 (0.34 to 0.89)    | 0.001  |
| Vanuatu                            | 71.56 (42.24 to 117.23)   | 66.72 (41.75 to 104.28)   | -0.76 (-0.83 to -0.69) | <0.001 |
| Venezuela (Bolivarian Republic of) | 25.22 (19.93 to 32.24)    | 25.04 (18.91 to 32.53)    | 0.1 (-0.13 to 0.32)    | 0.355  |
| Viet Nam                           | 31.14 (23.2 to 41.71)     | 27.73 (18.79 to 38.93)    | -1.2 (-1.29 to -1.11)  | <0.001 |
| Yemen                              | 41.87 (25.39 to 71.27)    | 41.43 (26.92 to 64.22)    | -0.28 (-0.45 to -0.1)  | 0.006  |
| Zambia                             | 73.61 (51.82 to 105.75)   | 65.42 (46.44 to 92.65)    | -1.27 (-1.52 to -1.02) | <0.001 |
| Zimbabwe                           | 60.02 (43.7 to 85.31)     | 56.34 (32.82 to 88)       | -0.65 (-0.89 to -0.41) | <0.001 |

Abbreviation: ASDALys: age-standardize disability-adjusted life year rate; APC: annual percentage change; CI: confidence interval; UI: uncertainty interval
